## 1 Targeting advanced prostate cancer with STEAP1 chimeric antigen receptor T cell 2 therapy

3  
4 Vipul Bhatia<sup>1,\*</sup>, Nikhil V. Kamat<sup>2,\*</sup>, Tiffany E. Pariva<sup>1,\*</sup>, Li-Ting Wu<sup>1</sup>, Annabelle Tsao<sup>1</sup>, Koichi  
5 Sasaki<sup>3</sup>, Lauren T. Wiest<sup>1</sup>, Ailin Zhang<sup>1</sup>, Dmytro Rudoy<sup>1</sup>, Roman Gulati<sup>4</sup>, Radhika A. Patel<sup>1</sup>,  
6 Martine P. Roudier<sup>5</sup>, Lawrence D. True<sup>6</sup>, Michael C. Haffner<sup>1,6,7</sup>, Peter S. Nelson<sup>1,2,4,5,6,7</sup>, Saul J.  
7 Priceman<sup>8,9</sup>, Jun Ishihara<sup>3</sup>, John K. Lee<sup>1,2,6,7,#</sup>

8  
9 <sup>1</sup> Human Biology Division, Fred Hutchinson Cancer Center. 1100 Fairview Ave N, Seattle, WA  
10 98109, USA.

11 <sup>2</sup> Division of Medical Oncology, University of Washington. 1959 NE Pacific Street, Seattle, WA,  
12 98195, USA.

13 <sup>3</sup> Department of Bioengineering, Imperial College London. 86 Wood Lane, London W12 0BZ,  
14 UK.

15 <sup>4</sup> Public Health Sciences Division, Fred Hutchinson Cancer Center. 100 Fairview Ave N, Seattle,  
16 WA 98109, USA.

17 <sup>5</sup> Department of Urology, University of Washington. 1959 NE Pacific Street, Seattle, WA, 98195,  
18 USA.

19 <sup>6</sup> Department of Pathology and Laboratory Medicine, University of Washington. 1959 NE Pacific  
20 Street, Seattle, WA 98195, USA.

21 <sup>7</sup> Clinical Research Division. Fred Hutchinson Cancer Center. 1100 Fairview Ave N, Seattle, WA  
22 98109, USA.

23 <sup>8</sup> Department of Hematology and Hematopoietic Cell Transplantation, City of Hope. 1500 East  
24 Duarte Road, Duarte, CA 91010, USA.

25 <sup>9</sup> Department of Immuno-Oncology, Beckman Research Institute of City of Hope. 1500 East  
26 Duarte Road, Duarte, CA 91010, USA.

27  
28 \* These authors contributed equally to this work.

29  
30 # Corresponding author:

31 John K. Lee [jklee5@fredhutch.org](mailto:jklee5@fredhutch.org)

32  
33 Vipul Bhatia [vbhatia@fredhutch.org](mailto:vbhatia@fredhutch.org)

34 Nikhil V. Kamat [kamatn@seattleca.org](mailto:kamatn@seattleca.org)

35 Tiffany E. Pariva [tiffany.pariva@gmail.com](mailto:tiffany.pariva@gmail.com)

36 Li-Ting Wu [lwu3@fredhutch.org](mailto:lwu3@fredhutch.org)

37 Annabelle Tsao [atsao@fredhutch.org](mailto:atsao@fredhutch.org)

38 Koichi Sasaki [k.sasaki@imperial.ac.uk](mailto:k.sasaki@imperial.ac.uk)

39 Lauren T. Wiest [lauren.wiest211@gmail.com](mailto:lauren.wiest211@gmail.com)

40 Ailin Zhang [azhang@fredhutch.org](mailto:azhang@fredhutch.org)

41 Dmytro Rudoy [drudoy@fredhutch.org](mailto:drudoy@fredhutch.org)

42 Roman Gulati [rgulati@fredhutch.org](mailto:rgulati@fredhutch.org)

43 Radhika A. Patel [rpatel2@fredhutch.org](mailto:rpatel2@fredhutch.org)

44 Martine P. Roudier [mroudier@uw.edu](mailto:mroudier@uw.edu)

45 Lawrence D. True [ltrue@uw.edu](mailto:ltrue@uw.edu)

46 Michael C. Haffner [mhaffner@fredhutch.org](mailto:mhaffner@fredhutch.org)

47 Peter S. Nelson [pnelson@fredhutch.org](mailto:pnelson@fredhutch.org)

48 Saul J. Priceman [spriceman@coh.org](mailto:spriceman@coh.org)

49 Jun Ishihara [j.ishihara@imperial.ac.uk](mailto:j.ishihara@imperial.ac.uk)

50

51 Keywords: STEAP1, chimeric antigen receptor, T cell, castration-resistant prostate cancer,  
52 adoptive cell therapy, immunotherapy

## 53 **Summary**

54

55 Six transmembrane epithelial antigen of the prostate 1 (STEAP1) is a compelling tumor-  
56 associated cell surface antigen for therapeutic targeting in solid tumors. We identified broad  
57 expression of STEAP1 (87% positive) in lethal metastatic prostate cancer, even more so than  
58 prostate-specific membrane antigen (PSMA, 60% positive) which is a clinically established  
59 diagnostic and therapeutic target. Second-generation chimeric antigen receptor (CAR) T cells  
60 were engineered for reactivity against STEAP1 and demonstrated substantial antitumor activity  
61 in metastatic human prostate cancer models in immunodeficient mice. Adoptive transfer of  
62 STEAP1 CAR T cells was associated with prolonged peripheral persistence and either disease  
63 eradication or substantial tumor growth inhibition with progressive disease demonstrating  
64 antigen loss. As STEAP1 CAR T cells were also highly active in antigen density conditions as  
65 low as ~1,500 molecules/cell, we generated a human STEAP1 (hSTEAP1) knock-in (KI) mouse  
66 to evaluate the potential for on-target off-tumor toxicities. hSTEAP1-KI mice demonstrated a  
67 pattern of systemic hSTEAP1 expression akin to that observed in humans with the greatest  
68 expression found in the prostate gland. Mouse-in-mouse studies of STEAP1 CAR T cell therapy  
69 in immunocompetent hSTEAP1-KI mice engrafted with disseminated mouse prostate cancer  
70 showed preliminary safety without evidence of gross toxicity, cytokine storm, or architectural  
71 disruption and increased T cell infiltration at sites of systemic hSTEAP1 expression. Tumor  
72 responses and extension of survival were appreciated but antigen loss was identified in  
73 recurrent and progressive disease. In summary, we report the extent of STEAP1 expression in  
74 treatment-refractory metastatic prostate cancer, the generation of a STEAP1 CAR T cell therapy  
75 with promising potency and safety in preclinical studies of advanced prostate cancer, and  
76 antigen escape as a mechanism of resistance to effective STEAP1 CAR T cell therapy.

## 77 **Introduction**

78

79 Metastatic prostate cancer represents an incurable disease responsible for over 33,000 deaths  
80 per year in the United States<sup>1</sup>. Prostate cancer is critically reliant on androgen receptor (AR)  
81 signaling and thus the suppression of gonadal androgen production through surgical or  
82 chemical castration (androgen deprivation therapy) has been a mainstay of treatment for  
83 advanced disease. However, metastatic prostate cancer inevitably develops resistance to  
84 androgen deprivation therapy and enters a stage called metastatic castration-resistant prostate  
85 cancer (mCRPC). mCRPC is currently incurable and is considered the end-stage of the disease  
86 and is associated with a median overall survival of three years<sup>2</sup>. In the past decade, multiple  
87 therapies including an inhibitor of extragonadal androgen synthesis (abiraterone acetate)<sup>3</sup>,  
88 second-generation AR antagonists (enzalutamide)<sup>4</sup>, radioactive isotope (radium-223)<sup>5</sup>, and a  
89 prostate-specific membrane antigen (PSMA)-specific radioligand therapy (lutetium Lu 177  
90 vipivotide tetraxetan)<sup>6</sup> have been approved for mCRPC. Each of these agents extends survival  
91 on average by several months but long-term remissions are rare.

92

93 Strategies to reprogram the immune system to combat prostate cancer first gained traction with  
94 the clinical approval of the dendritic cell vaccine sipuleucel-T for asymptomatic mCRPC<sup>7</sup>. More  
95 recently, several types of immunotherapies including immune checkpoint inhibitors, a DNA  
96 cancer vaccine, antibody-drug conjugates (ADC), T cell engaging bispecific antibodies (T-  
97 BsAb), and chimeric antigen receptor (CAR) T cell therapies have been under active clinical  
98 investigation. CARs are synthetic receptors that leverage the potency, expansion, and memory  
99 of T cells and can be engineered against virtually any tumor-associated cell surface antigen.

100 The adoptive transfer of CAR T cells has rapidly become an established treatment for  
101 hematologic malignancies with exceptional response rates leading to six clinical approvals in the  
102 last five years. In contrast, CAR T cell therapies targeting solid tumors have lagged due to



103 additional challenges related to the lack of *bona fide* tumor-specific antigens, inhospitable tumor  
104 microenvironments, and poor trafficking, persistence, and expansion of CAR T cells.

105  
106 Despite the challenges observed in driving effective immune responses toward solid tumors,  
107 recent early phase clinic trials investigating CAR T cell therapies targeting PSMA in mCRPC  
108 have reported safety and evidence of significant biochemical and radiographic responses<sup>8,9</sup>.  
109 These preliminary results serve to embolden efforts to develop and optimize new CAR T cell  
110 therapies for prostate cancer. While PSMA is the preeminent target for therapeutic and  
111 diagnostic development in prostate cancer, recent work indicates that PSMA expression may be  
112 quite heterogeneous in mCRPC<sup>10</sup>. Tumor antigen heterogeneity, especially in the context of  
113 single antigen-targeted CAR T cell therapies for solid tumors like prostate cancer, is an  
114 important barrier to therapeutic efficacy<sup>11</sup>. Thus, identifying cell surface antigens with broad and  
115 relatively homogeneous expression in prostate cancer is imperative. In addition, very few if any  
116 tumor-associated antigens demonstrate tumor-restricted expression—most also exhibit low level  
117 expression in normal tissues that could represent liabilities for CAR T cell therapies due to on-  
118 target off-tumor toxicities which can lead to devastating consequences including death<sup>12</sup>.

119  
120 We previously performed integrated transcriptomic and cell surface proteomic profiling of human  
121 prostate adenocarcinoma cell lines and identified six transmembrane epithelial antigen of the  
122 prostate 1 (STEAP1) as one of the most highly enriched cell surface antigens<sup>13</sup>. STEAP1 was  
123 first described over two decades ago<sup>14</sup> and was recognized as being highly expressed in  
124 prostate cancer. STEAP1 is strongly expressed in >80% of mCRPC with bone or lymph node  
125 involvement<sup>15</sup>, 62% of Ewing sarcoma<sup>16</sup>, and multiple other cancer types<sup>17</sup>. STEAP1 belongs to  
126 the STEAP family of metalloreductases that can form homotrimers or heterotrimers with other  
127 STEAP proteins<sup>18</sup>. STEAP1 has an established functional role in promoting cancer cell  
128 proliferation, invasion, and epithelial-to-mesenchymal transition<sup>19-23</sup>. Furthermore, STEAP1

129 demonstrates limited expression in normal tissue<sup>24</sup> which makes it a highly compelling target for  
130 cancer therapy.

131  
132 Multiple immunotherapeutic agents have been developed to target STEAP1 in cancer but an  
133 approach employing CAR T cell therapy has not yet been reported. The ADC vandortuzumab  
134 vedotin (DSTP3086S) consisting of a humanized anti-STEAP1 IgG1 antibody linked to  
135 monomethyl auristatin E was found to have an acceptable safety profile in a phase I clinical trial  
136 in mCRPC but few objective tumor responses were observed<sup>25</sup>. A T-BsAb incorporating two  
137 anti-STEAP1 fragment-antigen binding (Fab) domains, an anti-CD3 single chain variable  
138 fragment (scFv), and a fragment crystallizable (Fc) domain engineered to lack effector function  
139 called AMG 509 is currently being evaluated in a phase I clinical trial in mCRPC<sup>26</sup>. A symmetric  
140 dual bivalent T-BsAb called BC261 was also recently reported to demonstrate potent antitumor  
141 activity across multiple preclinical models of prostate cancer and Ewing sarcoma<sup>27</sup>. In addition,  
142 a human leukocyte antigen (HLA) class I-restricted T cell receptor (TCR) specific for a STEAP1  
143 peptide has been shown to inhibit local and metastatic Ewing sarcoma growth in a preclinical  
144 xenograft model after adoptive transfer of transgenic T cells<sup>28</sup>.

145  
146 In this study, we performed comparative analysis of the relative expression of STEAP1 and  
147 PSMA in lethal mCRPC to investigate the utility of targeting STEAP1 in the current era of PSMA  
148 theranostics. We engineered and screened second-generation STEAP1 CARs for antigen-  
149 specific T cell activation and target cell cytotoxicity which yielded a lead candidate for further  
150 characterization. We determined the functional epitope specificity of STEAP1 CAR T cells and  
151 profiled the expansion and immunophenotype of STEAP1 CAR T cell products from multiple  
152 donors. We then established the potency and preliminary safety of STEAP1 CAR T cell therapy  
153 in relevant preclinical human-in-mouse and mouse-in-mouse models of prostate cancer.  
154 Collectively, these studies provide strong rationale for the clinical translation of STEAP1 CAR T

155 cell therapy to men with mCRPC and guide future studies to overcome potential mechanisms of  
156 therapeutic resistance.

157 **Results**

158

159 *STEAP1 is broadly expressed in treatment-refractory mCRPC tissues*

160

161 We first set out to determine the pattern and extent of STEAP1 expression relative to PSMA in  
162 advanced metastatic prostate cancer. We performed immunohistochemical (IHC) staining on a  
163 duplicate set of tissue microarrays consisting of 121 metastatic tumors (each with up to three  
164 cores represented) collected from 45 men with lethal mCRPC patients collected by rapid  
165 autopsy between the years 2010 and 2017 through the University of Washington Tumor  
166 Acquisition Necropsy Program<sup>29</sup> (**figure 1A**). Plasma membrane staining for STEAP1 and  
167 PSMA in each tissue was scored by a research pathologist and semiquantitative H-scores were  
168 determined based on the staining intensity (0, 1, 2, or 3, **supplemental figure 1A**) multiplied by  
169 the percentage of cancer cells staining at each intensity (**figure 1B**). Based on these results, we  
170 used a generalized linear mixed statistical model to determine that the odds of non-zero staining  
171 was 7.7-fold (95% CI 2.8 to 20.8,  $p < 0.001$ ) higher for STEAP1 than for PSMA. By implementing  
172 a minimal staining threshold with an H-score cut-off of 30, we found that 87.7% of evaluable  
173 matched mCRPC tissues (100 of 114) demonstrated staining for STEAP1 compared to only  
174 60.5% (69 of 114) for PSMA (**figure 1C**). In addition, 28.1% of mCRPC tissues (32 of 114)  
175 showed STEAP1 but not PSMA staining (**figure 1D**) whereas only 0.9% (one of 114) exhibited  
176 PSMA but not STEAP1 staining. We also observed several cases with heterogeneous  
177 expression of PSMA within cores (**figure 1E**) which is consistent with a recent report of  
178 intratumoral PSMA heterogeneity in mCRPC biopsies<sup>10</sup>.

179

180 STEAP1 staining based on the minimal staining threshold was identified in 96% (48 of 50) of  
181 bone metastases, 95% (19 of 20) of lymph node metastases, and 76.6% (36 of 47) of visceral  
182 metastases (**supplemental figure 1B**). No difference in STEAP1 staining intensity was

183 observed between bone and lymph node or lymph node and visceral metastatic sites. However,  
184 bone metastases demonstrated a higher STEAP1 H-score than visceral metastases (183.6 vs.  
185 121.9,  $p=0.0018$ ). We identified a positive Pearson correlation ( $r=0.3057$ , 95% CI 0.1314 to  
186 0.4616,  $p<0.001$ ) between the expression of STEAP1 and AR in cases represented on the  
187 tissue microarray (**supplemental figure 1C**) which was expected given that *STEAP1* is an  
188 androgen-regulated gene<sup>30,31</sup>. In contrast, a negative correlation ( $r=-0.2172$ , 95% CI -0.3843 to -  
189 0.03628,  $p=0.0192$ ) was appreciated between the expression of STEAP1 and the  
190 neuroendocrine differentiation marker synaptophysin (**supplemental figure 1D**). These findings  
191 suggest that, like PSMA<sup>32</sup>, STEAP1 expression may be lost with neuroendocrine  
192 transdifferentiation of prostate cancer.

193

#### 194 *Development of a potent, antigen-specific STEAP1 CAR*

195

196 Given the widespread expression of STEAP1 in late-stage mCRPC and its reported functional  
197 role in cancer progression<sup>24,33,34</sup>, we next started to engineer a lentiviral STEAP1-specific  
198 second-generation CAR. We used the pCCL-c-MNDU3-X lentiviral backbone<sup>35</sup> which has been  
199 widely used for hematopoietic stem cell gene therapy<sup>36</sup> and CAR expression in T cells driven by  
200 the internal MNDU3 promoter has been shown to be higher than that achieved with an EFS  
201 promoter<sup>37</sup>. A 4-1BB costimulatory domain was favored due to its association with T cell  
202 memory formation and prolonged persistence<sup>38</sup> and a CD28 transmembrane domain was  
203 introduced as this has been shown to reduce the antigen threshold for second-generation 4-1BB  
204 CAR T cell activation<sup>39</sup>. We incorporated the fully humanized scFv derived from vandortuzumab  
205 vedotin, an ADC targeting STEAP1 whose development was discontinued after a phase I  
206 clinical trial<sup>25</sup>. This scFv is a humanized variant of the murine monoclonal antibody (mAb  
207 120.545) originally developed by Agensys, Inc. that demonstrates 1 nM affinity in cell-based  
208 binding assays<sup>40</sup>. To potentially tune CAR activity, we implemented three different hinge/spacer

209 lengths including short (IgG4 hinge), medium (IgG4 hinge-CH3), and long (IgG4 hinge-CH2-  
210 CH3). The long spacer was engineered with previously described 4/2-NQ mutations<sup>41</sup> in the  
211 CH2 domain to prevent Fc-gamma receptor binding and activation-induced cell death that  
212 occurs with the adoptive transfer of long spacer CAR T cells into immunodeficient mice. The  
213 three candidate CARs were cloned into the lentiviral vector (**figure 2A**) that also co-expresses  
214 truncated epidermal growth factor receptor (EGFRt) as a transduction marker. Lentiviruses were  
215 generated and used to transduce human CD4 and CD8 T cells enriched from human donor  
216 peripheral blood mononuclear cells (PBMCs) collected from pheresis. Expanded CD4 and CD8  
217 CAR T cells were immunophenotyped (**supplemental figure 2A**) and reconstituted into cell  
218 products of a defined composition with a normal CD4/CD8 ratio to evaluate their functional  
219 activities.

220  
221 To control for STEAP1 expression in an isogenic manner, we focused on the 22Rv1 human  
222 prostate cancer cell line that demonstrates native STEAP1 expression and performed STEAP1  
223 knockout (ko) by CRISPR/Cas9 genome editing. We then generated a STEAP1 rescue line from  
224 the 22Rv1 STEAP1 ko by transduction with a STEAP1 expressing lentivirus (**figure 2B**). These  
225 lines were then used to screen the three short, medium, and long spacer STEAP1 CAR T cells  
226 in co-culture assays with a readout of interferon-gamma (IFN- $\gamma$ ) release as an indicator of T cell  
227 activation. Only the long spacer STEAP1 CAR T cells (hereafter called STEAP1-BB $\zeta$  CAR T  
228 cells) demonstrated the anticipated antigen-specific pattern of IFN- $\gamma$  release (**figure 2C**,  
229 **supplemental figure 2B**). Further, STEAP1-BB $\zeta$  CAR T cells showed substantial dose-  
230 dependent cytotoxicity of 22Rv1 cells compared to untransduced T cells (**figure 2D**) and  
231 demonstrated relative sparing of 22Rv1 STEAP1 ko cells (**figure 2E**). Similar studies were then  
232 performed in the DU145 human prostate cancer cell line that lacks native STEAP1 expression  
233 but was engineered to express STEAP1 (DU145 STEAP1) by lentiviral transduction. In this  
234 setting, STEAP1-BB $\zeta$  CAR T cell activation was only observed in co-cultures with DU145

235 STEAP1 cells and not the parental DU145 cells (**supplemental figure 2C**). Cytolytic activity  
236 was only appreciated with STEAP1-BB $\zeta$  CAR T cells and not untransduced T cells in co-  
237 cultures with DU145 STEAP1 cells (**supplemental figure 2D**).

238  
239 We subsequently analyzed a larger panel of human prostate cancer cell lines to characterize  
240 their native STEAP1 expression by immunoblot analysis. The cell lines with known AR  
241 expression/activity (LNCaP, 22Rv1, VCaP, and LNCaP95) showed varying levels of STEAP1  
242 expression while the AR-null cell lines (PC3, DU145, MSKCC EF1, and NCI-H660) did not  
243 appear to express detectable levels of STEAP1 (**figure 2F**). We proceeded to perform co-  
244 cultures of STEAP1-BB $\zeta$  CAR T with these lines to further validate their antigen-specific  
245 activation based on IFN- $\gamma$  release (**figure 2G**). However, we observed a discordant finding in  
246 that the PC3 line, which showed no apparent STEAP1 protein expression (**figure 2F**), induced  
247 substantial activation of STEAP1-BB $\zeta$  CAR T cells. Prior literature suggested that STEAP1 is  
248 expressed in the PC3 cell line at low levels<sup>42</sup>. Indeed, prolonged immunoblot exposure revealed  
249 a band suggesting the presence of very low expression of STEAP1 (**figure 2H**). To confirm  
250 whether the STEAP1-BB $\zeta$  CAR T cell activation was due to this minor STEAP1 expression in  
251 PC3 cells, we generated three PC3 STEAP1 ko sublines (**figure 2H**) and again performed co-  
252 cultures with STEAP1-BB $\zeta$  CAR T cells. STEAP1 ko in the PC3 line led to the abrogation of  
253 STEAP1-BB $\zeta$  CAR T cell activation (**figure 2I**), further validating specificity and providing  
254 evidence of the sensitivity of STEAP1-BB $\zeta$  CAR T cells to low antigen density conditions.

255  
256 *Lack of cross-reactivity of STEAP1-BB $\zeta$  CAR with mouse Steap1 and human STEAP1B*

257  
258 Consistent with the anti-human specificity of vandortuzumab vedotin, STEAP1-BB $\zeta$  CAR T cells  
259 did not demonstrate cross reactivity with mouse Steap1 (**supplemental figure 3A-C**). However,  
260 we used this as an opportunity to individually reconstitute the three human STEAP1

261 extracellular domains (ECDs) onto mouse Steap1 (**supplemental figure 3D**) to determine  
262 which ECDs are critical for epitope recognition by STEAP1-BB $\zeta$  CAR T cells. Co-culture  
263 experiments were performed with STEAP1-BB $\zeta$  CAR T cells and DU145 cells engineered to  
264 express mouse Steap1 with individual replacement of mouse ECDs with human ECDs. We  
265 found that human STEAP1 ECD2 but not ECD1 or ECD3 was associated with STEAP1-BB $\zeta$   
266 CAR T cell activation (**supplemental figure 3E**). Interestingly, the human STEAP1 and mouse  
267 Steap1 ECD2 demonstrate 93.9% (31/33 amino acids) homology (**supplemental figure 3F**),  
268 indicating that Q198 and/or I209 of human STEAP1 are critical to productive recognition by  
269 STEAP1-BB $\zeta$  CAR T cells. Q198 has been shown to interact with the Fab of 120.545 as part of  
270 an interaction hotspot based on a recent structure resolved by cryogenic electron microscopy<sup>18</sup>.  
271  
272 Of the human STEAP family of proteins, STEAP1B has the greatest homology to STEAP1<sup>42</sup>.  
273 Three STEAP1B transcripts have been identified, of which all demonstrate complete  
274 conservation of the amino acid sequence of human STEAP1 ECD2 (**supplemental figure 4A**).  
275 The consensus membrane topology prediction algorithm TOPCONS<sup>43</sup> projected these  
276 sequences as being extracellular in the three STEAP1B protein isoforms (**supplemental figure**  
277 **4B**) albeit with low reliability scores due to a lack of consensus between models (**supplemental**  
278 **figure 4C**). Prior analysis using a hidden Markov model had also suggested that this sequence  
279 could be intracellular rather than extracellular in STEAP1B protein isoforms 1 and 2<sup>42</sup>. However,  
280 the crystal structure of STEAP1B has not yet been determined to directly substantiate these  
281 predictions. To functionally evaluate whether STEAP1-BB $\zeta$  CAR T cells might also be reactive  
282 against STEAP1B, we performed co-cultures using DU145 lines engineered to express each of  
283 the three isoforms of STEAP1B. We did not identify evidence of STEAP1-BB $\zeta$  CAR T cell  
284 activation (**supplemental figure 4D**), suggesting that the STEAP1 epitope recognized by  
285 STEAP1-BB $\zeta$  CAR T cells is not presented by STEAP1B despite apparent sequence homology.  
286



287 *Characterization of STEAP1-BBζ CAR T cell products across a series of donors*

288

289 We next profiled the expansion, transduction efficiency, and immunophenotype of STEAP1-BBζ  
290 CAR T cell products using three independent sets of peripheral blood mononuclear cells  
291 (PBMCs) collected from healthy donors. We generally observed a 20- to 40-fold expansion of  
292 STEAP1-BBζ CAR T cells within 11 days of culture (**supplementary figure 5A**). The  
293 percentage of EGFRt<sup>+</sup> CD8 T cells ranged from 24.3% to 54.2% while the percentage of  
294 EGFRt<sup>+</sup> CD4 T cells was higher and ranged from 60.1% to 74.9% in our STEAP1-BBζ CAR T  
295 cell products (**supplementary figure 5B**). We examined the expression of the T cell exhaustion  
296 markers PD-1 and LAG-3 in the untransduced and STEAP1-BBζ CAR T cell subsets and  
297 observed no significant increase in expression (**supplementary figure 5C**). This finding  
298 suggested low or absent tonic signaling by the STEAP1-BBζ CAR which was encouraging as  
299 constitutive CAR signaling can negatively impact CAR T cell effector function<sup>44</sup>.

300

301 Both stem cell memory T cell (Tscm) and central memory T cell (Tcm) phenotypes have been  
302 associated with the therapeutic efficacy of CAR T cell therapy as they promote sustained  
303 proliferation and persistence *in vivo*<sup>45-47</sup>. Immunophenotyping of untransduced and STEAP1-BBζ  
304 CAR T cell subsets demonstrated higher frequencies of Tscm cells compared to the T cell  
305 subsets in donor PBMCs from which the cell products were derived (**supplementary figure**  
306 **5D**). This effect is likely due to the addition of IL-7 and/or IL-15 to the T cell expansion media as  
307 these cytokines have been shown to preserve and enhance Tscm differentiation<sup>47,48</sup>. Our  
308 analysis also revealed an enrichment in Tcm populations particularly in the CD8 STEAP1-BBζ  
309 CAR T cells (**supplementary figure 5E**).

310

311 *STEAP1-BBζ CAR T cells demonstrate substantial antitumor effects in disseminated prostate*  
312 *cancer models with native STEAP1 expression established in immunodeficient mice*

313

314 As an initial screen for *in vivo* antitumor activity, we established 22Rv1 subcutaneous xenograft  
315 tumors in male NOD scid gamma (NSG) mice. When tumors grew to approximately 100 mm<sup>3</sup>,  
316 mice were treated with a single intratumoral injection of either 5 x 10<sup>6</sup> untransduced T cells or  
317 STEAP1-BBζ CAR T cells. Intratumoral treatment with STEAP1-BBζ CAR T cells was  
318 associated with significant tumor growth inhibition that was statistically significant by day 16 of  
319 treatment (**figure 3A**). Mice were sacrificed on day 25 and residual tumors from mice treated  
320 with STEAP1-BBζ CAR T cells showed large areas of necrotic debris and regions of viable  
321 tumor were infiltrated with CD3<sup>+</sup> STEAP1-BBζ CAR T cells (**supplemental figure 6A**). STEAP1  
322 expression was conserved in the tumors across treatment groups (**supplemental figure 6B**).

323

324 We transduced 22Rv1 cells with lentivirus to enforce firefly luciferase (fLuc) expression and 10<sup>6</sup>  
325 22Rv1-fLuc cells were injected into the tail veins of male NSG mice. Metastatic colonization was  
326 visualized by live bioluminescence imaging (BLI) after two weeks, at which point mice were  
327 treated with a single intravenous injection of either 5 x 10<sup>6</sup> untransduced T cells or STEAP1-BBζ  
328 CAR T cells (**figure 3B**). Serial BLI revealed rapid disease progression in mice treated with  
329 untransduced T cells while those receiving STEAP1-BBζ CAR T cells demonstrated a significant  
330 delay in tumor progression (**figure 3C,D**) and extension of survival (97 days versus 31 days,  
331 p=0.0018 by log-rank test, **figure 3E**). There was no significant difference in mouse weights  
332 between treatment arms (**supplemental figure 6C**). IHC staining of tumors at the end of study  
333 showed a significant reduction in STEAP1 expression (**supplemental figure 6D,E**), indicating  
334 that antigen escape was a mechanism of resistance. However, this was unlikely a result of  
335 transdifferentiation to a variant prostate cancer state as we did not appreciate morphologic  
336 changes or loss of PSMA expression<sup>49</sup> (**supplemental figure 6F**).

337

338 We also inoculated male NSG mice with C4-2B-fLuc cells by tail vein injection. C4-2B is a  
339 castration-resistant subline of LNCaP<sup>50</sup> with growth kinetics more in line with typical prostate  
340 cancer. Four weeks after injection, metastatic colonization was confirmed by BLI and mice were  
341 treated with single intravenous injection of either  $5 \times 10^6$  untransduced T cells or STEAP1-BB $\zeta$   
342 CAR T cells (**figure 3B**). Serial BLI showed a complete response in all mice who received  
343 STEAP1-BB $\zeta$  CAR T cells within five weeks of treatment (**figure 3F,G**). We identified a trend of  
344 increased weight loss in the untransduced T cell treatment group (**supplemental figure 7A**) but  
345 this was not statistically significant. Necropsy of mice treated with STEAP1-BB $\zeta$  CAR T cells  
346 showed no macroscopic disease and *ex vivo* BLI of organs did not reveal any signal  
347 (**supplemental figure 7B**), suggesting that these mice were likely cured. We identified  
348 peripheral persistence of STEAP1-BB $\zeta$  CAR T cells at the end of the experiment based on the  
349 presence of detectable CD3<sup>+</sup>EGFRt<sup>+</sup> splenocytes (**figure 3H**).

350

351 *Mouse-in-mouse STEAP1 CAR T cell studies demonstrate antitumor therapeutic efficacy*

352

353 The activation and cytolytic activity of STEAP1-BB $\zeta$  CAR T cells observed in the very low  
354 STEAP1 antigen density (~1,500 molecules/cell) context of the PC3 cell line (**figure 2G-I**,  
355 **supplemental figure 8A,B**) and evidence of *in vivo* antitumor activity in a disseminated PC3-  
356 fLuc tumor model (**supplemental figure 8C-E**) presented concerns about the potential for on-  
357 target, off-tumor toxicities. To evaluate for potential toxicity in a tractable model organism, we  
358 generated a human STEAP1 knock-in (hSTEAP1-KI) mouse in which the human *STEAP1* gene  
359 was knocked into the mouse *Steap1* gene locus on the C57Bl/6 background (**figure 4A**). A  
360 mouse colony was established with genotyping performed by polymerase chain reaction (PCR)  
361 of tail DNA (**figure 4B**). Both homozygous and heterozygous hSTEAP1-KI mice exhibited no  
362 apparent phenotypic or reproductive abnormalities compared to wildtype littermates. A tissue  
363 survey for human STEAP1 expression based on quantitative reverse transcription PCR (qRT-

364 PCR) was performed on male and female heterozygous hSTEAP1-KI (hSTEAP1-KI/+) mice and  
365 revealed greatest relative expression in the prostate, followed by the uterus and adrenal gland  
366 (**figure 4C**). Further *in situ* analysis by STEAP1 IHC of male hSTEAP1-KI/+ prostate and  
367 adrenal glands revealed human STEAP1 expression confined to luminal epithelial cells of the  
368 prostate (**figure 4D**) and expression in the adrenal cortex (**figure 4E**).

369  
370 A murinized version of the STEAP1 CAR, called STEAP1-mBB $\zeta$  CAR, in which the scFv and  
371 IgG4 hinge-CH2-CH3 spacer were retained but the CD28 transmembrane domain, 4-1BB  
372 costimulatory domain, and CD3 $\zeta$  activation domain were replaced with their mouse orthologs  
373 was cloned into a gammaretroviral construct (**figure 4F**). In addition, the human EGFRt  
374 transduction marker was replaced with a truncated mouse CD19 (mCD19t) to minimize potential  
375 immunogenicity. We confirmed the efficient retroviral transduction of T cells enriched from  
376 mouse splenocytes (**figure 4G**) and demonstrated the capacity of mouse STEAP1-mBB $\zeta$  CAR  
377 T cells to induce cytolysis of the RM9 mouse prostate cancer cell line<sup>51</sup> engineered to express  
378 human STEAP1 (RM9-hSTEAP1) by lentiviral transduction (**figure 4H**).

379  
380 The *in vivo* efficacy of mouse STEAP1-mBB $\zeta$  CAR T cells was validated in a disseminated  
381 RM9-STEAP1-fLuc tumor model in NSG mice (**supplemental figure 9A**). One week after tail  
382 vein injection of RM9-STEAP1-fLuc cells, mice were treated with either  $5 \times 10^6$  untransduced  
383 mouse T cells or mouse STEAP1-mBB $\zeta$  CAR T cells by tail vein injection. Mice that received  
384 untransduced mouse T cells demonstrated unchecked disease progression, whereas those  
385 treated with STEAP1-mBB $\zeta$  CAR T cells uniformly exhibited rapid disease regression which was  
386 followed by subsequent relapse ten days later (**supplemental figure 9B,C**). STEAP1-mBB $\zeta$   
387 CAR T cell therapy was associated with a statistically significant survival benefit (22 days versus  
388 12 days,  $p=0.0039$  by log-rank test, **supplemental figure 9D**). Weight loss was evident in both  
389 treatment groups as tumor burden increased prior to death (**supplemental figure 9E,F**).

390 Analysis of mouse splenocytes collected at necropsy showed peripheral persistence of  
391 STEAP1-mBB $\zeta$  CAR T cells with the detection of mCD3<sup>+</sup> mCD19t<sup>+</sup> cells up to 24 days after  
392 adoptive transfer (**supplemental figure 9G**). Lungs were harvested from mice in both treatment  
393 groups and STEAP1 IHC showed loss of STEAP1 expression in pulmonary metastases from  
394 mice treated with STEAP1-mBB $\zeta$  CAR T cells (**supplemental figure 9H**).

395  
396 We subsequently expanded clonal RM9-STEAP1-fLuc lines to determine whether the observed  
397 tumor antigen escape could be a result of pre-existing heterogeneity in STEAP1 expression.  
398 The experiment was repeated with a clonal, disseminated RM9-STEAP1-fLuc tumor model in  
399 NSG mice (**supplemental figure 10A**). In this context, mice treated with STEAP1-mBB $\zeta$  CAR T  
400 cells demonstrated a prompt and durable complete response (**supplemental figure 10B-D**).  
401 These findings further highlight the potency of STEAP1-mBB $\zeta$  CAR T cells in eradicating  
402 STEAP1<sup>+</sup> prostate cancer and suggest that adjunct therapeutic strategies may be needed to  
403 overcome resistance in subgroups of advanced prostate cancer patients where inter- or intra-  
404 tumor STEAP1 heterogeneity is present (**figure 2B**).

405  
406 *STEAP1 CAR T cell therapy is safe in a humanized STEAP1 mouse model*

407  
408 To investigate both the preclinical safety and efficacy of STEAP1-mBB $\zeta$  CAR T cell therapy, we  
409 inoculated male heterozygous hSTEAP1-KI mice with syngeneic, non-clonal RM9-STEAP1-fLuc  
410 cells by tail vein injection (**figure 5A**). After confirmation of metastatic colonization by BLI about  
411 a week later, mice received pre-conditioning cyclophosphamide 100 mg/kg by intraperitoneal  
412 injection<sup>52</sup>. A day later, mice were randomized to treatment with either 5 x 10<sup>6</sup> untransduced  
413 mouse T cells or mouse STEAP1-mBB $\zeta$  CAR T cells by tail vein injection. All mice that received  
414 mouse STEAP1-mBB $\zeta$  CAR T cells demonstrated a decrease in tumor burden within the first  
415 week of treatment initiation based on BLI (**figure 5B,C**). The observed response was short-lived

416 but led to a modest extension of survival (21 days versus 12 days,  $p=0.0138$  by log-rank test,  
417 **figure 5D**)—similar to findings from the non-clonal RM9-STEAP1-fLuc experiments in NSG  
418 mice (**supplemental figure 9D**).

419  
420 There were no gross toxicities or premature deaths specifically associated with mouse STEAP1-  
421 mBB $\zeta$  CAR T cell therapy at this dose level where clear evidence of antitumor efficacy was  
422 observed. Weight loss was associated with increased tumor burden but common to both  
423 treatment arms (**figure 5E,F**). Plasma cytokine analysis of IFN- $\gamma$ , IL-2, IL-6, and TNF- $\alpha$  at day 0  
424 and day 8 of treatment showed no changes indicative of cytokine storm (**supplemental figure**  
425 **11**). Importantly, heterozygous hSTEAP1-KI mice treated with STEAP1-mBB $\zeta$  CAR T cells  
426 demonstrated no obvious tissue disruption or increased infiltration of CD3<sup>+</sup> T cells in the  
427 prostate (**supplemental figure 12A,B**) or adrenal gland (**supplemental figure 12C,D**) relative  
428 to their counterparts treated with untransduced T cells. Lungs collected at the end of the  
429 experiment showed human STEAP1 expression in pulmonary metastases with regional  
430 heterogeneity in mice treated with untransduced mouse T cells (**figure 5G**). On the other hand,  
431 tumors from mice treated with mouse STEAP1-mBB $\zeta$  CAR T cells again demonstrated an  
432 absence of human STEAP1 expression (**figure 5H**). These data provide preliminary preclinical  
433 evidence that STEAP1 can be safely targeted with potent CAR T cell therapy without severe  
434 toxicities.

435 **Discussion**

436

437 The effectiveness of CAR T cell therapy and other immune-based targeted therapeutics is  
438 highly dependent on consistent antigen expression on all or most cells comprising the tumor  
439 population within an individual patient. However, antigen heterogeneity is pronounced in solid  
440 tumors including prostate cancer, where progression to mCRPC and treatment resistance are  
441 associated with the emergence of divergent disease subtypes marked by distinct transcriptional  
442 programs<sup>53-55</sup> and cell surface antigen expression<sup>13</sup>. While PSMA is considered one of the  
443 foremost biomarkers in prostate cancer with significant overexpression found across the  
444 spectrum of disease progression, our work corroborates findings from a recent publication<sup>10</sup>  
445 indicating that PSMA expression is heterogeneous in lethal mCRPC. We show that STEAP1 is  
446 more broadly expressed than PSMA in this setting but is by no means expressed uniformly at  
447 high levels in all mCRPC tissues. No single antigen-targeted therapy including CAR T cell  
448 therapy may be able to overcome pre-existing tumor antigen heterogeneity in mCRPC. Thus, it  
449 is of critical importance to thoroughly credential additional therapeutic targets such as STEAP1  
450 in mCRPC that may enable combinatorial therapies that exert insurmountable therapeutic  
451 pressure. These include dual antigen-targeted (e.g., PSMA and STEAP1) CAR T cell therapies  
452 or multimodal strategies combining CAR T cell therapies with ADCs, T-BsAbs, or other  
453 treatments that potently promote antigen-independent and -dependent tumor killing.

454

455 We engineered a STEAP1-targeted CAR T cell therapy that is highly antigen-specific and  
456 functionally localized the epitope recognized by the CAR to the second ECD of STEAP1. Our  
457 STEAP1 CAR T cells demonstrate substantial antitumor activity against multiple disseminated  
458 prostate cancer models both in human-in-mouse and mouse-in-mouse studies. Importantly, our  
459 STEAP1 CAR is capable of inducing T cell activation and target cell cytotoxicity even in low  
460 antigen density conditions, as evidenced by reactivity against the PC3 prostate cancer model.

461 However, this sensitivity of STEAP1 CAR T cells to low levels of STEAP1 expression may be  
462 advantageous from the perspective of enhancing antitumor efficacy but could also accentuate  
463 liabilities from on-target off-tumor toxicity. Systemic expression of STEAP1 has previously been  
464 reported as virtually absent in normal human tissues<sup>14,56</sup> except the prostate gland where  
465 membranous expression in prostate epithelial cells has been described<sup>24</sup>. To delve the safety of  
466 STEAP1 CAR T cell therapy in the preclinical setting, we exceeded the standard in the field by  
467 generating a humanized STEAP1 mouse model. The hSTEAP1-KI mouse model recapitulated  
468 human STEAP1 expression in the prostate gland and showed expression in the adrenal cortex.  
469 Reassuringly, STEAP1 CAR T cell therapy at a dose sufficient to induce antitumor activity did  
470 not lead to evident systemic toxicities in hSTEAP1-KI mice including on-target off-tumor  
471 toxicities at sites of human STEAP1 expression.

472  
473 A recurring mechanism of prostate cancer relapse and progression after STEAP1 CAR T cell  
474 therapy in our studies was tumor antigen escape. On one hand, this finding underscores the  
475 overall potency of our STEAP1 CAR T cell therapy. However, it is unclear whether the loss of  
476 tumor STEAP1 expression is solely due to inherent tumor antigen heterogeneity or whether  
477 there is also adaptive downregulation of STEAP1 expression. A recent publication showed that  
478 promoter methylation of *STEAP1* modulates STEAP1 expression and epigenetic deregulation  
479 by DNA methyltransferase and histone deacetylase inhibition was sufficient to significantly  
480 upregulate STEAP1 expression<sup>57</sup>. Perhaps treatment with epigenetic inhibitors in combination  
481 with STEAP1 CAR T cell therapy could simultaneously enhance tumor STEAP1 expression and  
482 reprogram CAR T cells to favorable exhaustion-resistant differentiation states<sup>58,59</sup>, thereby  
483 mitigating tumor antigen loss and enhancing antitumor efficacy in prostate cancer. Another  
484 consideration is that STEAP1 has been functionally implicated in cancer progression and a prior  
485 study indicated that acute STEAP1 gene knockdown reduced cell viability and proliferation while  
486 inducing apoptosis in prostate cancer<sup>34</sup>. However, the mechanistic basis for these effects has



487 not been elucidated. An interesting observation is that STEAP1 is unique from other STEAP  
488 family members (STEAP2, 3, and 4) in that it lacks an intracellular oxidoreductase domain<sup>18</sup>  
489 which is necessary for metalloredox activity. As a result, STEAP1 homotrimers, but not  
490 heterotrimers with other STEAP proteins, lack enzymatic function to reduce Fe<sup>3+</sup> to Fe<sup>2+</sup> and  
491 Cu<sup>2+</sup> to Cu<sup>1+</sup>. Whether and how the involvement of STEAP1 in metal ion metabolism promotes  
492 cancer progression has yet to be determined and is worthy of further investigation.

493  
494 The immunologically 'cold' tumor microenvironment of prostate cancer is a major barrier to the  
495 efficacy of cancer immunotherapies including immune checkpoint inhibitors. In addition,  
496 exploratory studies associated with a phase I clinical trial of PSMA CAR T cell therapy armored  
497 to express dominant-negative transforming growth factor- $\beta$  receptor (TGF $\beta$ R-DN) in mCRPC  
498 showed that the expression of immunosuppressive signaling molecules in the tumor  
499 microenvironment increases after CAR T infusion<sup>9</sup>. In our work, we have used a disseminated,  
500 syngeneic RM9-hSTEAP1 tumor model in hSTEAP1-KI to approximate the immunosuppressive  
501 nature of mCRPC based on prior characterization of RM9 as a poorly immunogenic model<sup>52,60</sup>.  
502 One caveat is that this may not fully recapitulate the complexity of the human tumor immune  
503 microenvironment. Thus, additional approaches such as armoring STEAP1 CAR T cells to  
504 express TGF $\beta$ R-DN<sup>61</sup> or recombinant cytokines<sup>62</sup> (e.g., IL-12, IL-15, or IL-18) or the concurrent  
505 systemic administration of novel immunomodulators may be necessary to enhance the effector  
506 function of STEAP1 CAR T cells within the hostile tumor microenvironment of prostate cancer.

507  
508 The findings of our studies have led to a partnership with the National Cancer Institute (NCI)  
509 Experimental Therapeutics (NExT) Program with the goal of translating STEAP1 CAR T cell  
510 therapy to a first-in-human trial for men with mCRPC. Safety and efficacy signals from this early  
511 phase clinical trial will help determine whether there may also be value in investigating this  
512 therapeutic approach for other cancer types that highly express STEAP1.

## 513 **Methods**

514

### 515 *Cell lines*

516

517 22Rv1 (CRL-2505), LNCaP (CRL-1740), PC3 (CRL-1435), DU145 (HTB-81), NCI-H660 (CRL-  
518 5813), C4-2B (CRL-3315), RM9 (RL-3312), and Myc-CaP (CRL-3255) were obtained from the  
519 American Type Culture Collection. LNCaP95 cells were a gift from Stephen R. Plymate  
520 (University of Washington, Seattle). MSKCC EF1 were derived from the MSKCC PCa4 organoid  
521 line provided by Yu Chen (Memorial Sloan Kettering Cancer Center), as previously described<sup>13</sup>.  
522 Cell lines were maintained in RPMI 1640 medium supplemented with 10% FBS, 100 U/mL  
523 penicillin and 100 µg/mL streptomycin, and 4 mmol/L GlutaMAX (Thermo Fisher). 22Rv1  
524 STEAP1 ko and PC3 STEAP1 ko cells were generated by transient transfection of 22Rv1 cells  
525 with a pool of PX458 (Addgene, #48138) plasmids each expressing one of four different sgRNA  
526 targeting sequences predicted from the Broad Institute Genetic Perturbation Platform sgRNA  
527 Designer<sup>63</sup>: 1) 5'-ATAGTCTGTCTTACCCAATG-3'; 2) 5'-CCTTTGTAGCATAAGGACAC-3'; 3)  
528 5'-ATCCACTTATCCAACCAATG-3'; and 4) 5'-CATCAACAAAGTCTTGCCAA-3'. 48-72 hours  
529 after transfection, GFP-positive cells were singly sorted on a Sony SH800 Cell Sorter into a 96-  
530 well plate and clonally expanded.

531

532 gBlocks encoding firefly luciferase (fLuc), hSTEAP1, mSTEAP1, mSTEAP1 hECD1, mSTEAP1  
533 hECD2, mSTEAP1 hECD3, hSTEAP1B isoform 1, hSTEAP1B isoform 2, and hSTEAP1B  
534 isoform 3 were cloned into the EcoRI site of FU-CGW<sup>64</sup> by HiFi DNA Assembly. The FU-  
535 hSTEAP1-CGW plasmid was modified to excise the GFP cassette by digestion with AgeI and  
536 BsrGI. A PCR product encoding firefly (fLuc) was then inserted by HiFi DNA assembly to  
537 generate the FU-hSTEAP1-C-fLuc-GW plasmid. These lentiviruses were produced and titered

538 as previously described<sup>65</sup>. Lentiviruses were used to introduce stable transgene expression in  
539 the cell lines noted above.

540

#### 541 *Animal studies*

542

543 All mouse studies were performed in accordance with protocols approved by the Fred  
544 Hutchinson Cancer Center Institutional Animal Care and Use Committee and regulations of  
545 Comparative Medicine.

546

547 For studies using immunocompromised mice, six- to eight-week-old male NSG (NOD-SCID-  
548 IL2R $\gamma$ -null) mice were obtained from The Jackson Laboratory. For the 22Rv1 subcutaneous  
549 tumor and intratumoral T cell administration model,  $2 \times 10^6$  22Rv1 cells were suspended in 100  
550  $\mu$ l ice-cold Matrigel matrix (Corning) and injected subcutaneously into the flanks of NSG mice.  
551 Tumors were measured twice weekly using electronic calipers and tumor volume (TV)  
552 calculated based on the equation  $TV = \frac{1}{2} (L * W^2)$ . When TV was  $\sim 75$ -100 mm<sup>3</sup>,  $5 \times 10^6$   
553 untransduced or STEAP1 CAR T cells at a defined CD4/CD8 composition of 1:1 and suspended  
554 in 100  $\mu$ l of PBS was injected intratumorally. Mice were sacrificed 25 days after intratumoral T  
555 cell therapy. For disseminated human prostate cancer and intravenous T cell administration  
556 models, between  $5 \times 10^5$  and  $10^6$  prostate cancer cells were suspended in 100  $\mu$ l of PBS and  
557 injected into the tail veins of NSG mice. Tumor burden was monitored by live bioluminescence  
558 imaging on an IVIS Spectrum (PerkinElmer) after intraperitoneal injection of XenoLight D-  
559 luciferin (PerkinElmer). When metastatic colonization was confirmed by imaging,  $5 \times 10^6$  human  
560 untransduced or STEAP1-BB $\zeta$  CAR T cells at a defined CD4/CD8 composition of 1:1 and  
561 suspended in 100  $\mu$ l of PBS was injected by tail vein. Metastatic tumors and spleen were  
562 harvested when mice were euthanized at compassionate endpoints. In the disseminated C4-2B  
563 model, lungs and livers were collected from a subset of mice and placed individually in six-well

564 plates in DMEM media supplemented with 10% FBS and GlutaMAX. *Ex vivo* bioluminescence  
565 imaging was performed by introducing XenoLight D-luciferin into the media and quantifying  
566 signal on an IVIS Spectrum. Metastatic tumors were formalin-fixed and paraffin-embedded.  
567 Splenocytes were harvested from spleens to perform flow cytometry to evaluate the peripheral  
568 persistence of CAR T cells.

569  
570 For animal studies using hSTEAP1-KI mice, heterozygous hSTEAP1-KI mice were generated  
571 by crossing homozygous hSTEAP1-KI mice with wildtype C57Bl/6 mice. Genotyping of all  
572 hSTEAP1-KI mice was performed by PCR of 10 ng of tail DNA using the Taq 2X Master Mix  
573 (New England Biolabs) and visualization of PCR products by gel electrophoresis on a 2%  
574 agarose gel. Primers used for genotyping PCR reactions are 1) wildtype: forward 5'-  
575 CTAGGTGGCTGAAGCCGTA-3' and reverse 5'-GCGATGACCAAAGTGA CTTC-3', 2)  
576 hSTEAP1-KI: forward 5'-CAGATGAGGTAGGATGGGATAAAC-3' and reverse 5'-  
577 CCTCAAGCATGGCAGGAATAG-3'. Thermocycler conditions for genotyping PCR are 95°C x  
578 30 seconds; (95°C x 30 seconds, 58°C x 30 seconds, 68°C x 70 seconds) x 35 cycles; 68°C x 5  
579 minutes; and 12°C hold.

580  
581 For disseminated RM9-hSTEAP1-fLuc mouse prostate cancer and intravenous T cell  
582 administration models,  $5 \times 10^5$  RM9-hSTEAP1-fLuc cells were suspended in 100  $\mu$ l of PBS and  
583 injected into the tail veins of either NSG or heterozygous hSTEAP1-KI mice. Tumor burden was  
584 monitored by live bioluminescence imaging on an IVIS Spectrum (PerkinElmer) after  
585 intraperitoneal injection of XenoLight D-luciferin (PerkinElmer). When metastatic colonization  
586 was confirmed by imaging,  $5 \times 10^6$  mouse untransduced or STEAP1-mBB $\zeta$  CAR T cells  
587 suspended in 100  $\mu$ l of PBS was injected by tail vein. Retroorbital blood was collected using  
588 heparinized capillary tubes into polystyrene tubes containing an EDTA/PBS solution. After  
589 collection, retroorbital blood samples were incubated at room temperature for 15-20 minutes

590 and centrifuged in a tabletop centrifuge at 2,000 x g for 10 minutes. Plasma was collected and  
591 stored at -80°C. Lungs, spleen, prostate, and adrenal glands were harvested when mice were  
592 euthanized at compassionate endpoints. Lungs, prostate, and adrenal glands were formalin-  
593 fixed and paraffin-embedded. Splenocytes were harvested from spleens to perform flow  
594 cytometry to evaluate the peripheral persistence of CAR T cells.

595

#### 596 *Immunohistochemical studies*

597

598 Tissue sections were deparaffinized in xylene and rehydrated in 100%, 95%, 75% ethanol, and  
599 finally TBS with 0.1% Tween 20 (TBST). Antigen retrieval was conducted in Citrate-Based  
600 Antigen Unmasking Solution (Vector Labs) using a pressure cooker at 95°C for 30 minutes.  
601 Tissue sections were blocked with Dual Endogenous Enzyme-Blocking Reagent (Agilent  
602 Technologies) and incubated for 10 minutes followed by three washes with TBST. Slides were  
603 incubated with primary antibody in a humidified chamber at 37°C for one hour. Primary  
604 antibodies and dilutions used for this study are rabbit anti-STEAP1 antibody (LS Bio, LS-  
605 C291740, 1:500), rabbit anti-CD3 antibody (Thermo Fisher, MA5-14524, 1:100), and mouse  
606 anti-PSMA antibody (Dako, M3620, 1:50). Slides were washed with TBST and incubated with  
607 PowerVision Poly-HRP anti-rabbit IgG or anti-mouse IgG (Leica Biosystems) in a humidified  
608 chamber at 37°C for 30 minutes. Slides were washed with TBST and incubated with 3,3'-  
609 Diaminobenzidine (DAB) (Sigma Aldrich) for at room temperature for 10 minutes. DAB was  
610 quenched in deionized water. Slides were stained in Dako hematoxylin (Agilent Technologies)  
611 at room temperature for one minute and washed with deionized water for five minutes. Slides  
612 were dehydrated in 75%, 95%, 100% ethanol, and finally xylene. Slides were mounted using  
613 Permount mounting medium (Fisher Chemical) and cover slipped.

614

#### 615 *Prostate cancer tissue microarray analysis*

616  
617 University of Washington mCRPC Tissue Acquisition Necropsy (TAN) tissue microarrays  
618 (Prostate Cancer Biorepository Network) were used for immunohistochemical studies. Each  
619 core stained with either STEAP1 or PSMA was scored by an experienced pathologist (M.P.R)  
620 and assigned an intensity score of 0, 1, 2, or 3 and frequency of positive cell staining ranging  
621 from 0% to 100%. H-scores were generated for each core by multiplying the intensity score by  
622 the frequency of positive cell staining resulting in a minimum of 0 and maximum of 300. The  
623 average H-score of replicate cores represented in the tissue microarray was determined for  
624 each mCRPC tissue.

625  
626 *Immunoblotting*

627  
628 Protein extracts were collected in 9 M urea lysis buffer and quantified using the Pierce Rapid  
629 Gold BCA Protein Assay Kit (Thermo Fisher). Protein samples were fractionated with SDS-  
630 PAGE using Bolt 4-12% Bis-Tris Plus Gels (Thermo Fisher) and transferred to nitrocellulose  
631 membranes using the Invitrogen Mini Blot module (Thermo Fisher). Membranes were blocked  
632 with 5% non-fat milk in PBS + 0.5% Tween 20 (PBST) on a shaker at room temperature for 30  
633 minutes. Membranes were then incubated with primary antibody on a shaker at 4°C overnight.  
634 Primary antibodies used for this study are mouse anti-STEAP (Santa Cruz, sc-271872, 1:1,000)  
635 and GAPDH (GeneTex, GX627408, 1:5,000). Membranes were washed with PBST and  
636 incubated with goat anti-mouse IgG (H+L) secondary antibody conjugated with horseradish  
637 peroxidase (Thermo Fisher, 31430, 1:10,000) on a shaker at room temperature for 1 hour.  
638 Membranes were washed with PBST, incubated with Immobilon Western Chemiluminescent  
639 HRP Substrate (EMD Millipore) at room temperature for three minutes, and visualized on a  
640 ChemiDoc MP Imaging System (Bio-Rad Laboratories).

641

642 *Absolute STEAP1 quantification*

643

644 Flow cytometric quantification of STEAP1 antigen density across human prostate cancer cell  
645 lines was performed using Quantum Simply Cellular microspheres (Bangs Laboratories) per the  
646 manufacturer's protocol. Vandortuzumab (Creative Biolabs) was used as the primary antibody  
647 and rat anti-human IgG Fc antibody conjugated to APC (BioLegend) was used as the secondary  
648 antibody. Stained cells and beads were analyzed on a BD FACSCanto II (BD Biosciences). The  
649 Geo Mean or Median channel values for each population were recorded into the provided  
650 QuickCal spreadsheet yielding a regression coefficient of 0.998.

651

652 *Chimeric antigen receptors (CAR) expression plasmids*

653 gBlocks (Integrated DNA Technologies) encoding the GM-CSF leader, DSTP3086S scFv (VL-  
654 [G4S]3-VH), IgG4 spacers, CD28 transmembrane domain, 4-1BB costimulatory domain, CD3 $\zeta$   
655 chain, EGFRt or mCD19t, and WPRE were cloned into the EcoRI site of pCCL-c-MNDU3-X (gift  
656 from Donald Kohn, Addgene plasmid #81071) or pMYs (Cell Biolabs) by HiFi DNA Assembly  
657 (New England Biolabs). Sequences involving cloning junctions and open reading frames were  
658 validated by Sanger sequencing at the Fred Hutch Genomics & Bioinformatics Shared  
659 Resource.

660

661 *CAR lentivirus and retrovirus production*

662

663 For STEAP1-BB $\zeta$  CAR lentivirus production, HEK 293T cells (ATCC) were thawed, cultured,  
664 and expanded in DMEM media supplemented with 10% FBS and GlutaMAX. HEK 293T cells  
665 were seeded on plates coated with Cultrex Poly-L-Lysine (R&D Systems) prior to transfection  
666 with the pCCI-c-MNDU3 STEAP1-BB $\zeta$  CAR lentiviral plasmid and the packaging plasmids  
667 pMDL, pVSVg, and pREV using the TransIT-293 transfection reagent (Mirus Bio). About 18

668 hours after transfection, sodium butyrate and HEPES were added to each plate to a final  
669 concentration of 20 mM each. Eight hours later, media was aspirated from the plates and each  
670 plate was washed with PBS. DMEM media supplemented with 10% FBS, GlutaMAX, and 20  
671 mM HEPES was added to each plate. Lentiviral supernatant was collected at 48 hours after  
672 transfection, vacuum filtered through a 0.22  $\mu$ m filter, and concentrated by ultracentrifugation in  
673 polypropylene Konical tubes (Beckman Coulter) at 22,000 rpm at 4°C for two hours in an  
674 Optima XE 90 (Beckman Coulter). Lentiviral pellets were resuspended in the minimal residual  
675 media present after aspirating off supernatant, aliquoted in cryovials and stored at -80°C.

676  
677 For STEAP1-mBB $\zeta$  CAR retrovirus production, PLAT-E cells (Cell Biolabs) were thawed and  
678 cultured in DMEM media supplemented with 10% FBS, GlutaMAX, 1  $\mu$ g/ml puromycin, and 10  
679  $\mu$ g/ml blasticidin. One day prior to seeding cells for transfection, PLAT-E cells were washed and  
680 seeded in antibiotic-free DMEM media supplemented with 10% FBS and GlutaMAX. PLAT-E  
681 cells were transfected with the pMYs STEAP1-mBB $\zeta$  CAR retroviral construct using the  
682 FuGENE HD transfection reagent (Promega). 48 and 72 hours after transfection, supernatants  
683 containing retrovirus were passed through a 0.22  $\mu$ m syringe filter prior to use in transduction.

684  
685 *Human CAR T cell manufacturing*

686  
687 Peripheral blood mononuclear cells (PBMCs) from three de-identified healthy donors obtained  
688 by pheresis from the Fred Hutch Co-Operative Center for Excellence in Hematology were  
689 thawed and washed with pre-warmed TCM base media consisting of AIM-V media (Gibco)  
690 supplemented with 55 mM beta-mercaptoethanol, human male AB plasma (Sigma), and  
691 GlutaMAX. PBMCs were centrifuged in a tabletop centrifuge at 1500 rpm for 5 minutes. Cells  
692 were resuspended in TCM base media and counted on a hemacytometer. Dynabeads CD8 and  
693 CD4 Positive Isolation Kits were used per manufacturer's protocol to separate CD8 and CD4 T



694 cells. After bead detachment, CD8 T cells were seeded in CD8 media (TCM base media  
695 supplemented with 50 U/ml human IL-2 and 0.5 ng/ml human IL-15) and CD4 T cells were  
696 seeded in CD4 media (TCM base media supplemented with 0.5 ng/ml human IL-15 and 5 ng/ml  
697 human IL-7). CD8 and CD4 T cells were activated and expanded with Dynabeads Human T-  
698 Activator CD3/CD28 (Thermo Fisher) per manufacturer's protocol. After two to four days, CD8  
699 and CD4 T cells were counted and transduced with STEAP1-BB $\zeta$  CAR lentivirus at a relative  
700 multiplicity-of-infection of 10 based on the infectious titer on HEK 293T cells. Lentiviral  
701 transduction was performed in the presence of 10  $\mu$ g/ml protamine sulfate. 48 hours after  
702 transduction, T cells were collected, activation beads removed, and transduction efficiency of  
703 the T cells evaluated by flow cytometry. CAR-modified CD4 and CD8 T cells were counted  
704 every two days and maintained at a density of 10<sup>6</sup> cells/ml in their respective CD4 and CD8  
705 media.

706

#### 707 *Mouse CAR T cell manufacturing*

708

709 Splenocytes were harvested from the manual dissociation of spleens obtained from  
710 heterozygous hSTEAP1-KI mice. Splenocytes were passed through a 70  $\mu$ m strainer and  
711 pelleted by centrifugation at 1,600 rpm for six minutes. Cells were resuspended in RBC lysis  
712 buffer (BioLegend) and incubated on ice for five minutes. Cells were washed with PBS and  
713 pelleted by centrifugation. Murine CD3<sup>+</sup> T cells were isolated using Mouse CD3<sup>+</sup> T Cell  
714 Enrichment Columns (R&D Systems) per the manufacturer's protocol. T cells were cultured in  
715 RPMI 1640 media containing 10% FBS, 50 U/ml human IL-2, 10 ng/ml murine IL-7, and 50  $\mu$ M  
716 beta-mercaptoethanol. T cells were activated and expanded with Dynabeads Mouse T-Activator  
717 CD3/CD28 (Thermo Fisher) per manufacturer's protocol. 48 and 72 hours later, mouse T cells  
718 were transduced with filtered pMYs STEAP1-mBB $\zeta$  CAR retroviral supernatants via  
719 spinoculation on a tabletop centrifuge at 2,000 x g at 30°C for two hours. On day six of culture,

720 beads were magnetically removed and T cell transduction efficiency was determined by flow  
721 cytometry prior to use in functional assays.

722

723 *Immunophenotyping CAR T cell products and assessment of peripheral persistence*

724

725  $1.5 \times 10^5$  human PBMCs, human untransduced or STEAP1-BB $\zeta$  CAR T cells, mouse  
726 untransduced or STEAP1- BB $\zeta$  CAR T cells, or splenocytes were incubated with fluorophore  
727 conjugated antibodies on ice for 20 minutes. Antibodies used for human cells are mouse anti-  
728 human CD3 conjugated to APC (Thermo Fisher, 47-0036-42), mouse anti-human CD8  
729 conjugated to FITC (BD Biosciences, 555366), rabbit anti-human EGFR (cetuximab) conjugated  
730 to PE (Novus Biologicals, NBP2-52671PE), mouse anti-human CD3 conjugated to BUV395 (BD  
731 Biosciences, 563548), mouse anti-human CD4 conjugated to BV605 (BioLegend, 344645),  
732 mouse anti-human CD8 conjugated to BUV805 (BD Biosciences, 564912), mouse anti-human  
733 CD45RO conjugated to BV510 (BioLegend, 304246), mouse anti-human CD45RA conjugated  
734 to BV711 (BioLegend, 304138), mouse anti-human PD-1 conjugated to BV421 (BD  
735 Biosciences, 565935), mouse anti-human CD95 conjugated to BUV615 (BD Biosciences,  
736 752346), mouse anti-human CXCR3 conjugated to BV421 (BioLegend, 353716), mouse anti-  
737 human CD62L conjugated to BV785 (BD Biosciences, 565311), and mouse anti-human LAG-3  
738 conjugated to BV421 (BD Biosciences, 565721). Antibodies used for mouse cells are rat anti-  
739 mouse CD8a conjugated to FITC (BioLegend, 100706) and rat anti-mouse CD19 conjugated to  
740 PE (BioLegend, 115508). Cells were washed with PBS after antibody staining and acquired on  
741 a BD FACSCanto II or BD Symphony 4. Data were analyzed on FlowJo v.10 (Treestar).

742

743 *Immunologic co-culture assays*

744

745 CAR T cell functional assays were performed by co-culturing prostate cancer cells engineered  
746 to express GFP with either human or mouse untransduced or STEAP1 CAR T cells at variable  
747 effector-to-target (E:T) ratios in 96-well plates. For cytotoxicity assays, 96-well clear bottom  
748 black wall plates (Corning) were coated with Cultrex Poly-L-Lysine for 30 minutes and seeded  
749 with prostate cancer cells. Plates were incubated at 37°C for one hour. Effector cells were then  
750 counted and seeded into wells with tumor cells at specified E:T ratios. The plates were placed  
751 into a BioTek BioSpa 8 Automated Incubator (Agilent Technologies) and read by brightfield and  
752 fluorescence imaging on a BioTek Cytation 5 Cell Imaging Multi-Mode Reader (Agilent  
753 Technologies) every six hours for a total of six days. Target cells were quantified based on the  
754 number of GFP<sup>+</sup> objects identified per scanned area using BioTek Gen5 Imager Software  
755 (Agilent Technologies). To assess T cell activation based on cytokine release, 25-50 µl of co-  
756 culture supernatants were collected at 24 and 48 hours of co-culture and stored at -30°C.

757

#### 758 *Mitogen stimulation of T cells*

759

760 T cells were stimulated with 5 ng/ml of phorbol 12-myristate 13-acetate (PMA, Sigma Aldrich)  
761 and 250 ng/ml of ionomycin (Sigma Aldrich) or with 5 µg/ml of phytohemagglutinin-L (PHA-L,  
762 Sigma Aldrich). Supernatants were collected at 24 hours for use as a positive control for IFN-γ  
763 ELISA studies or T cells were used as a positive control for induction of the exhaustion markers  
764 PD-1 and LAG-3 as assessed by flow cytometry.

765

#### 766 *Enzyme-linked immunosorbent assay*

767

768 To determine IFN-γ levels in co-culture supernatants, samples were thawed and sandwich  
769 ELISA for human or mouse IFN-γ levels was performed using the BD Human IFN-gamma  
770 ELISA Set (BD Biosciences, 555142) or BD Mouse IFN-gamma ELISA Set (BD Biosciences,

771 555138) according to the manufacturer's protocol. Plates were read at 450 nm and 560 nm  
772 wavelengths using a BioTek Cytation 3 Cell Imaging Multi-Mode Microplate Reader (Agilent  
773 Technologies). Plasma samples isolated from retroorbital bleeds were used for ProcartaPlex  
774 immunoassays (Thermo Fisher) to quantify levels of mouse IFN- $\gamma$ , IL-2, IL-6, and TNF- $\alpha$   
775 according to the manufacturer's protocol. Samples were assayed on a Luminex 100/200 System  
776 (Luminex).

777 **Data availability**

778 All data related to the study are included in the article or uploaded as supplementary  
779 information.

780

781 **Competing interests**

782 T.E.P. and J.K.L. are inventors on a patent related to this work. J.I. is a co-founder and  
783 shareholder of Arrowimmune, Inc. J.I. is a scientific advisor of Libo Pharma Corp.

784

785 **Author contributions**

786 V.B.: Data curation, formal analysis, validation, investigation, visualization, methodology,  
787 writing-original draft, writing-review and editing. N.V.K.: Data curation, formal analysis,  
788 investigation, visualization, and methodology. T.E.P.: Conceptualization, data curation, formal  
789 analysis, investigation, visualization, and methodology. L.W.: Data curation and investigation.  
790 A.T.: Data curation and investigation. K.S.: Data curation and investigation. L.T.W.: Data  
791 curation and investigation. A.Z.: Data curation and investigation. D.R.: Data curation and  
792 investigation. R.G.: Formal analysis. R.P.: Data curation and investigation. M.P.R.: Formal  
793 analysis. L.T.: Data curation and writing-review and editing. M.C.H.: Data curation, formal  
794 analysis, and writing-review and editing. P.N.S.: Conceptualization and writing-review and  
795 editing. S.J.P.: Formal analysis, methodology, writing-review and editing. J.I.: Formal analysis,  
796 validation, investigation, and writing-review and editing. J.K.L.: Conceptualization, data curation,  
797 formal analysis, validation, investigation, visualization, methodology, writing-original draft,  
798 writing-review and editing.

799

800 **Acknowledgments**

801 We grateful first and foremost to the patients and their families for their contributions, without  
802 which this research would not have been possible. We acknowledge Celestia Higano, Evan Yu,

803 Heather Chang, Bruce Montgomery, Elahe Mostaghel, Andrew Hsieh, Daniel Lin, Funda Vakar-  
804 Lopez, Xiaotun Zhang, Lawrence True, and the rapid autopsy teams for the contributions to the  
805 University of Washington Prostate Cancer Donor Rapid Autopsy Program. We thank the Fred  
806 Hutch Co-Operative Center for Excellence in Hematology (supported by U54 DK106829). We  
807 also thank the Fred Hutch Genomics Shared Resource, Comparative Medicine Shared  
808 Resource, Flow Cytometry Shared Resource, Experimental Histopathology Shared Resource,  
809 and Immune Monitoring Shared Resource (supported by NIH/NCI Cancer Center Support Grant  
810 P30 CA015704).

811  
812 This research was funded in part by a Department of Defense Prostate Cancer Research  
813 Program Award (W81XWH-21-1-0581 to J.K.L.), a Fred Hutch/University of Washington Cancer  
814 Consortium Safeway Pilot Award (J.K.L.), a Seattle Cancer Care Alliance/Swim Across America  
815 Award (J.K.L.), the Pacific Northwest Prostate Cancer SPORE P50 CA097186 (P.S.N., L.T.,  
816 and R.G.), the Institute for Prostate Cancer Research (M.P.R), the Doris Duke Charitable  
817 Foundation (2021184 to M.C.H), NCI R50 CA221836 (R.G.), JSPS Overseas Research  
818 Fellowships (202160429 to K.S.) and a Movember Foundation-Prostate Cancer Foundation  
819 Challenge Award (P.S.N. and J.K.L.).

## 820 References

- 821 1. Siegel, R.L., Miller, K.D., Fuchs, H.E. & Jemal, A. Cancer statistics, 2022. *CA: a cancer*  
822 *journal for clinicians* **72**, 7-33 (2022).
- 823 2. Armstrong, A.J., *et al.* Five-year Survival Prediction and Safety Outcomes with  
824 Enzalutamide in Men with Chemotherapy-naïve Metastatic Castration-resistant Prostate  
825 Cancer from the PREVAIL Trial. *European urology* **78**, 347-357 (2020).
- 826 3. Fizazi, K., *et al.* Abiraterone plus Prednisone in Metastatic, Castration-Sensitive Prostate  
827 Cancer. *New England Journal of Medicine* **377**, 352-360 (2017).
- 828 4. Scher, H.I., *et al.* Increased Survival with Enzalutamide in Prostate Cancer after  
829 Chemotherapy. *New England Journal of Medicine* **367**, 1187-1197 (2012).
- 830 5. Parker, C., *et al.* Alpha Emitter Radium-223 and Survival in Metastatic Prostate Cancer.  
831 *New England Journal of Medicine* **369**, 213-223 (2013).
- 832 6. Sartor, O., *et al.* Lutetium-177–PSMA-617 for Metastatic Castration-Resistant Prostate  
833 Cancer. *New England Journal of Medicine* **385**, 1091-1103 (2021).
- 834 7. Kantoff, P.W., *et al.* Sipuleucel-T immunotherapy for castration-resistant prostate cancer.  
835 *The New England journal of medicine* **363**, 411-422 (2010).
- 836 8. Slovin, S.F., *et al.* Phase 1 study of P-PSMA-101 CAR-T cells in patients with metastatic  
837 castration-resistant prostate cancer (mCRPC). *Journal of Clinical Oncology* **40**, 98-98  
838 (2022).
- 839 9. Narayan, V., *et al.* PSMA-targeting TGFβ-insensitive armored CAR T cells in metastatic  
840 castration-resistant prostate cancer: a phase 1 trial. *Nature medicine* **28**, 724-734  
841 (2022).
- 842 10. Paschalis, A., *et al.* Prostate-specific Membrane Antigen Heterogeneity and DNA Repair  
843 Defects in Prostate Cancer. *European urology* (2019).
- 844 11. Chen, N., Li, X., Chintala, N.K., Tano, Z.E. & Adusumilli, P.S. Driving CARs on the  
845 uneven road of antigen heterogeneity in solid tumors. *Current opinion in immunology* **51**,  
846 103-110 (2018).
- 847 12. Morgan, R.A., *et al.* Case report of a serious adverse event following the administration  
848 of T cells transduced with a chimeric antigen receptor recognizing ERBB2. *Molecular*  
849 *therapy : the journal of the American Society of Gene Therapy* **18**, 843-851 (2010).
- 850 13. Lee, J.K., *et al.* Systemic surfaceome profiling identifies target antigens for immune-  
851 based therapy in subtypes of advanced prostate cancer. *Proceedings of the National*  
852 *Academy of Sciences of the United States of America* **115**, E4473-e4482 (2018).
- 853 14. Hubert, R.S., *et al.* STEAP: a prostate-specific cell-surface antigen highly expressed in  
854 human prostate tumors. *Proceedings of the National Academy of Sciences of the United*  
855 *States of America* **96**, 14523-14528 (1999).
- 856 15. Nolan-Stevaux, O. Abstract DDT02-03: AMG 509: A novel, humanized, half-Life  
857 extended, bispecific STEAP1 × CD3 T cell recruiting XmAb<sup>®</sup> 2+1 antibody.  
858 *Cancer research* **80**, DDT02-03-DDT02-03 (2020).
- 859 16. Grunewald, T.G., *et al.* High STEAP1 expression is associated with improved outcome  
860 of Ewing's sarcoma patients. *Annals of oncology : official journal of the European*  
861 *Society for Medical Oncology* **23**, 2185-2190 (2012).
- 862 17. Moreaux, J., Kassambara, A., Hose, D. & Klein, B. STEAP1 is overexpressed in  
863 cancers: a promising therapeutic target. *Biochemical and biophysical research*  
864 *communications* **429**, 148-155 (2012).
- 865 18. Oosterheert, W. & Gros, P. Cryo-electron microscopy structure and potential enzymatic  
866 function of human six-transmembrane epithelial antigen of the prostate 1 (STEAP1). *The*  
867 *Journal of biological chemistry* **295**, 9502-9512 (2020).
- 868 19. Hubert, R.S., *et al.* STEAP: a prostate-specific cell-surface antigen highly expressed in  
869 human prostate tumors. **96**, 14523-14528 (1999).



- 870 20. Jiao, Z., *et al.* Six-transmembrane epithelial antigen of the prostate 1 expression  
871 promotes ovarian cancer metastasis by aiding progression of epithelial-to-mesenchymal  
872 transition. **154**, 215-230 (2020).
- 873 21. Gomes, I.M., Arinto, P., Lopes, C., Santos, C.R. & Maia, C.J. STEAP1 is overexpressed  
874 in prostate cancer and prostatic intraepithelial neoplasia lesions, and it is positively  
875 associated with Gleason score. in *Urologic Oncology: Seminars and Original*  
876 *Investigations*, Vol. 32 53. e23-53. e29 (Elsevier, 2014).
- 877 22. Huo, S.-f., *et al.* STEAP1 facilitates metastasis and epithelial–mesenchymal transition of  
878 lung adenocarcinoma via the JAK2/STAT3 signaling pathway. **40**(2020).
- 879 23. Gomes, I.M., *et al.* Knockdown of STEAP1 inhibits cell growth and induces apoptosis in  
880 LNCaP prostate cancer cells counteracting the effect of androgens. **35**, 1-10 (2018).
- 881 24. Gomes, I.M., Maia, C.J. & Santos, C.R. STEAP proteins: from structure to applications in  
882 cancer therapy. *Molecular cancer research : MCR* **10**, 573-587 (2012).
- 883 25. Danila, D.C., *et al.* Phase I Study of DSTP3086S, an Antibody-Drug Conjugate Targeting  
884 Six-Transmembrane Epithelial Antigen of Prostate 1, in Metastatic Castration-Resistant  
885 Prostate Cancer. *Journal of clinical oncology : official journal of the American Society of*  
886 *Clinical Oncology* **37**, 3518-3527 (2019).
- 887 26. Kelly, W.K., *et al.* Phase I study of AMG 509, a STEAP1 x CD3 T cell-recruiting XmAb  
888 2+1 immune therapy, in patients with metastatic castration-resistant prostate cancer  
889 (mCRPC). *Journal of Clinical Oncology* **38**, TPS5589-TPS5589 (2020).
- 890 27. Lin, T.-Y., Park, J.A., Long, A., Guo, H.-F. & Cheung, N.-K.V. Novel potent anti-STEAP1  
891 bispecific antibody to redirect T cells for cancer immunotherapy. *Journal for*  
892 *immunotherapy of cancer* **9**, e003114 (2021).
- 893 28. Schober, S.J., *et al.* MHC Class I-Restricted TCR-Transgenic CD4(+) T Cells Against  
894 STEAP1 Mediate Local Tumor Control of Ewing Sarcoma In Vivo. *Cells* **9**(2020).
- 895 29. Roudier, M.P., *et al.* Phenotypic heterogeneity of end-stage prostate carcinoma  
896 metastatic to bone. *Human pathology* **34**, 646-653 (2003).
- 897 30. Gomes, I.M., Santos, C.R., Socorro, S. & Maia, C.J. Six transmembrane epithelial  
898 antigen of the prostate 1 is down-regulated by sex hormones in prostate cells. *The*  
899 *Prostate* **73**, 605-613 (2013).
- 900 31. Sharp, A., *et al.* Androgen receptor splice variant-7 expression emerges with castration  
901 resistance in prostate cancer. *The Journal of clinical investigation* **129**, 192-208 (2019).
- 902 32. Bakht, M.K., *et al.* Neuroendocrine differentiation of prostate cancer leads to PSMA  
903 suppression. *Endocrine-related cancer* **26**, 131-146 (2018).
- 904 33. Ihlaseh-Catalano, S.M., *et al.* STEAP1 protein overexpression is an independent marker  
905 for biochemical recurrence in prostate carcinoma. *Histopathology* **63**, 678-685 (2013).
- 906 34. Gomes, I.M., *et al.* Knockdown of STEAP1 inhibits cell growth and induces apoptosis in  
907 LNCaP prostate cancer cells counteracting the effect of androgens. *Med Oncol* **35**, 40  
908 (2018).
- 909 35. Logan, A.C., *et al.* Factors influencing the titer and infectivity of lentiviral vectors. *Human*  
910 *gene therapy* **15**, 976-988 (2004).
- 911 36. Morgan, R.A., Gray, D., Lomova, A. & Kohn, D.B. Hematopoietic Stem Cell Gene  
912 Therapy: Progress and Lessons Learned. *Cell stem cell* **21**, 574-590 (2017).
- 913 37. Larson, S.M., *et al.* Pre-clinical development of gene modification of haematopoietic  
914 stem cells with chimeric antigen receptors for cancer immunotherapy. *Hum Vaccin*  
915 *Immunother* **13**, 1094-1104 (2017).
- 916 38. Salter, A.I., *et al.* Phosphoproteomic analysis of chimeric antigen receptor signaling  
917 reveals kinetic and quantitative differences that affect cell function. *Science signaling*  
918 **11**(2018).
- 919 39. Majzner, R.G., *et al.* Tuning the Antigen Density Requirement for CAR T-cell Activity.  
920 *Cancer discovery* **10**, 702-723 (2020).



- 921 40. Challita-Eid, P.M., *et al.* Monoclonal Antibodies to Six-Transmembrane Epithelial Antigen  
922 of the Prostate-1 Inhibit Intercellular Communication *In vitro* and Growth of  
923 Human Tumor Xenografts *In vivo*. *Cancer research* **67**, 5798-5805 (2007).
- 924 41. Hudecek, M., *et al.* The nonsignaling extracellular spacer domain of chimeric antigen  
925 receptors is decisive for in vivo antitumor activity. *Cancer immunology research* **3**, 125-  
926 135 (2015).
- 927 42. Gomes, I.M., Santos, C.R. & Maia, C.J. Expression of STEAP1 and STEAP1B in  
928 prostate cell lines, and the putative regulation of STEAP1 by post-transcriptional and  
929 post-translational mechanisms. *Genes & cancer* **5**, 142-151 (2014).
- 930 43. Bernsel, A., Viklund, H., Hennerdal, A. & Elofsson, A. TOPCONS: consensus prediction  
931 of membrane protein topology. *Nucleic acids research* **37**, W465-W468 (2009).
- 932 44. Long, A.H., *et al.* 4-1BB costimulation ameliorates T cell exhaustion induced by tonic  
933 signaling of chimeric antigen receptors. *Nature medicine* **21**, 581-590 (2015).
- 934 45. Berger, C., *et al.* Adoptive transfer of effector CD8+ T cells derived from central memory  
935 cells establishes persistent T cell memory in primates. *The Journal of clinical*  
936 *investigation* **118**, 294-305 (2008).
- 937 46. Gattinoni, L., *et al.* A human memory T cell subset with stem cell-like properties. *Nature*  
938 *medicine* **17**, 1290-1297 (2011).
- 939 47. Xu, Y., *et al.* Closely related T-memory stem cells correlate with in vivo expansion of  
940 CAR-CD19-T cells and are preserved by IL-7 and IL-15. *Blood* **123**, 3750-3759 (2014).
- 941 48. Cieri, N., *et al.* IL-7 and IL-15 instruct the generation of human memory stem T cells from  
942 naive precursors. *Blood* **121**, 573-584 (2013).
- 943 49. Hansel, D.E., *et al.* Shared TP53 gene mutation in morphologically and phenotypically  
944 distinct concurrent primary small cell neuroendocrine carcinoma and adenocarcinoma of  
945 the prostate. *The Prostate* **69**, 603-609 (2009).
- 946 50. Chen, M.E., Lin, S.H., Chung, L.W. & Sikes, R.A. Isolation and characterization of  
947 PAGE-1 and GAGE-7. New genes expressed in the LNCaP prostate cancer progression  
948 model that share homology with melanoma-associated antigens. *The Journal of*  
949 *biological chemistry* **273**, 17618-17625 (1998).
- 950 51. Baley, P.A., Yoshida, K., Qian, W., Sehgal, I. & Thompson, T.C. Progression to  
951 androgen insensitivity in a novel in vitro mouse model for prostate cancer. *The Journal of*  
952 *steroid biochemistry and molecular biology* **52**, 403-413 (1995).
- 953 52. Murad, J.P., *et al.* Pre-conditioning modifies the TME to enhance solid tumor CAR T cell  
954 efficacy and endogenous protective immunity. *Molecular therapy : the journal of the*  
955 *American Society of Gene Therapy* **29**, 2335-2349 (2021).
- 956 53. Beltran, H., *et al.* Divergent clonal evolution of castration-resistant neuroendocrine  
957 prostate cancer. *Nature medicine* **22**, 298-305 (2016).
- 958 54. Bluemn, E.G., *et al.* Androgen Receptor Pathway-Independent Prostate Cancer Is  
959 Sustained through FGF Signaling. *Cancer cell* **32**, 474-489.e476 (2017).
- 960 55. Labrecque, M.P., *et al.* Molecular profiling stratifies diverse phenotypes of treatment-  
961 refractory metastatic castration-resistant prostate cancer. *The Journal of clinical*  
962 *investigation* **130**, 4492-4505 (2019).
- 963 56. Grunewald, T.G., *et al.* STEAP1 is associated with the invasive and oxidative stress  
964 phenotype of Ewing tumors. *Molecular cancer research : MCR* **10**, 52-65 (2012).
- 965 57. Rocha, S.M., *et al.* Promoter Demethylation Upregulates STEAP1 Gene Expression in  
966 Human Prostate Cancer: In Vitro and In Silico Analysis. *Life (Basel)* **11**(2021).
- 967 58. Wang, Y., *et al.* Low-dose decitabine priming endows CAR T cells with enhanced and  
968 persistent antitumour potential via epigenetic reprogramming. *Nature communications*  
969 **12**, 409 (2021).

- 970 59. Lei, X., *et al.* A Pan-Histone Deacetylase Inhibitor Enhances the Antitumor Activity of B7-  
971 H3-Specific CAR T Cells in Solid Tumors. *Clinical Cancer Research* **27**, 3757-3771  
972 (2021).
- 973 60. Nasu, Y., *et al.* Adenovirus-mediated interleukin-12 gene therapy for prostate cancer:  
974 suppression of orthotopic tumor growth and pre-established lung metastases in an  
975 orthotopic model. *Gene therapy* **6**, 338-349 (1999).
- 976 61. Kloss, C.C., *et al.* Dominant-Negative TGF-beta Receptor Enhances PSMA-Targeted  
977 Human CAR T Cell Proliferation And Augments Prostate Cancer Eradication. *Molecular*  
978 *therapy : the journal of the American Society of Gene Therapy* **26**, 1855-1866 (2018).
- 979 62. Yeku, O.O. & Brentjens, R.J. Armored CAR T-cells: utilizing cytokines and pro-  
980 inflammatory ligands to enhance CAR T-cell anti-tumour efficacy. *Biochemical Society*  
981 *transactions* **44**, 412-418 (2016).
- 982 63. Doench, J.G., *et al.* Optimized sgRNA design to maximize activity and minimize off-  
983 target effects of CRISPR-Cas9. *Nature biotechnology* **34**, 184-191 (2016).
- 984 64. Xin, L., *et al.* Progression of prostate cancer by synergy of AKT with genotropic and  
985 nongenotropic actions of the androgen receptor. *Proceedings of the National Academy*  
986 *of Sciences of the United States of America* **103**, 7789-7794 (2006).
- 987 65. Xin, L., Lawson, D.A. & Witte, O.N. The Sca-1 cell surface marker enriches for a  
988 prostate-regenerating cell subpopulation that can initiate prostate tumorigenesis.  
989 *Proceedings of the National Academy of Sciences of the United States of America* **102**,  
990 6942-6947 (2005).

991

992 **Main Figure Legends**

993

994 **Figure 1. Comparative analysis of STEAP1 and PSMA in lethal, metastatic castration-**

995 **resistant prostate cancer (mCRPC). (A)** Characteristics of the mCRPC tissues represented on

996 University of Washington Tissue Acquisition Necropsy Tissue Microarray 92 (UW TAN TMA92).

997 **(B)** Plot showing paired average H-scores of STEAP1 (red) and PSMA (blue)

998 immunohistochemical (IHC) staining of all cores from each mCRPC tissue. **(C)** Contingency

999 table showing the frequency of mCRPC tissues with STEAP1 or PSMA IHC staining above or

1000 below an H-score threshold of 30. Micrographs of select mCRPC tissues after STEAP1 and

1001 PSMA IHC staining to highlight the **(D)** absence of PSMA but presence of STEAP1 expression

1002 and **(E)** intratumoral heterogeneity of PSMA expression but not STEAP1. Scale bars = 50  $\mu$ m.

1003

1004 **Figure 2. Screening second-generation 4-1BB chimeric antigen receptors (CARs) to**

1005 **identify a lead for STEAP1 CAR T cell therapy. (A)** Schematic of the lentiviral STEAP1 CAR

1006 construct and variation based on short, medium, and long spacers. LTR = long terminal repeat;

1007 MNDU3 = Moloney murine leukemia virus U3 region; scFv = single-chain variable fragment; VL

1008 = variable light chain; VH = variable heavy chain; tm = transmembrane; EGFRt = truncated

1009 epidermal growth factor receptor; 4/2 NQ = CH2 domain mutations to prevent binding to Fc-

1010 gamma receptors. **(B)** Immunoblot analysis showing expression of STEAP1 in 22Rv1 parental

1011 cells, 22Rv1 STEAP1 knockout (ko) cells, and 22Rv1 STEAP1 ko cells with rescue of STEAP1

1012 expression by lentiviral expression. GAPDH is used as a protein loading control. **(C)** IFN- $\gamma$

1013 enzyme-linked immunosorbent assay (ELISA) results from co-cultures of either untransduced T

1014 cells or STEAP1-BB $\zeta$  CAR T cells with each of the 22Rv1 sublines at a 1:1 ratio at 24 hours. n =

1015 4 replicates per condition. Bars represent SD. **(D)** Relative cell viability of 22Rv1 target cells

1016 over time measured by fluorescence live cell imaging upon co-culture with (left) STEAP1-BB $\zeta$

1017 CAR T cells or (right) untransduced T cells at variable effector-to-target (E:T) cell ratios. **(E)**

1018 Relative cell viability of 22Rv1 STEAP1 ko target cells over time measured by fluorescence live  
1019 cell imaging upon co-culture with (left) STEAP1-BB $\zeta$  CAR T cells or (right) untransduced T cells  
1020 at variable E:T cell ratios. In **D** and **E**, n = 4 replicates per condition and bars represent SEM.  
1021 **(F)** Immunoblot analysis demonstrating expression of STEAP1 in androgen receptor (AR)-  
1022 positive human prostate cancer cell lines but not AR-negative prostate cancer cell lines. GAPDH  
1023 is used as a protein loading control. **(G)** IFN- $\gamma$  quantification by ELISA from co-cultures of either  
1024 untransduced T cells or STEAP1-BB $\zeta$  CAR T cells with each of the human prostate cancer cell  
1025 lines in **F** at a 1:1 ratio at 24 hours. n = 4 replicates per condition. Bars represent SD. **(H)**  
1026 Immunoblot analysis with prolonged exposure to evaluate expression of STEAP1 in 22Rv1,  
1027 PC3, and PC3 STEAP1 ko sublines. GAPDH is used as a protein loading control. **(I)** IFN- $\gamma$   
1028 quantification by ELISA from co-cultures of either untransduced T cells or STEAP1-BB $\zeta$  CAR T  
1029 cells with each of the human prostate cancer cell lines in **F** at a 1:1 ratio at 24 hours. n = 4  
1030 replicates per condition. Error bars represent SEM. For panel **C** and **I**, two-way ANOVA with  
1031 Sidak's multiple comparison test was used. For panels **D** and **E**, two-way ANOVA with Tukey's  
1032 multiple comparisons test was used.

1033  
1034 **Figure 3. *In vivo* antitumor activity of STEAP1-BB $\zeta$  CAR T cell therapy in prostate cancer**  
1035 **models with native STEAP1 expression. (A)** Volumes of 22Rv1 subcutaneous tumors in NSG  
1036 mice over time after a single intratumoral injection of  $5 \times 10^6$  untransduced T cells or STEAP1-  
1037 BB $\zeta$  CAR T cells at normal CD4/CD8 ratios. **(B)** Schematic of tumor challenge experiments for  
1038 22Rv1 (top) and C4-2B (bottom) disseminated models. fLuc = firefly luciferase; BLI =  
1039 bioluminescence imaging. **(C)** Serial live bioluminescence imaging (BLI) of NSG mice engrafted  
1040 with 22Rv1-fLuc metastases and treated with a single intravenous injection of  $5 \times 10^6$   
1041 untransduced T cells or STEAP1-BB $\zeta$  CAR T cells at normal CD4/CD8 ratios on day 0. Red X  
1042 denotes deceased mice. Radiance scale is shown. **(D)** Plot showing the quantification of total  
1043 flux over time from live BLI of each mouse in **C**. **(E)** Kaplan-Meier survival curves of mice in **C**

1044 with statistical significance determined by log-rank (Mantel-Cox) test. **(F)** Serial live BLI of NSG  
1045 mice engrafted with C4-2B metastases and treated with a single intravenous injection of  $5 \times 10^6$   
1046 untransduced T cells or STEAP1-BB $\zeta$  CAR T cells at normal CD4/CD8 ratios on day 0. Red X  
1047 denotes deceased mice. Radiance scale is shown. **(G)** Plot showing the quantification of total  
1048 flux over time from live BLI of each mouse in **F**. **(H)** Quantification of CD3<sup>+</sup>EGFRt<sup>+</sup> STEAP1-BB $\zeta$   
1049 CAR T cells by flow cytometry from splenocytes of mice treated with STEAP1-BB $\zeta$  CAR T cells  
1050 at the end of experiment on day 49. Error bars represent SD. \* denotes  $p < 0.05$ ; \*\*\* denotes  $p$   
1051  $< 0.0001$ . For panel **A**, two-way ANOVA with Sidak's multiple comparison test was used.

1052  
1053 **Figure 4. Establishing a mouse-in-mouse system with a novel human STEAP1 knock-in**  
1054 **(hSTEAP1-KI) mouse model and murinized STEAP1 CAR.** **(A)** Schematic showing the  
1055 homologous recombination strategy using a targeting vector to knock-in human *STEAP1* exons  
1056 2-5 into the mouse *Steap1* locus on the C57Bl/6 background. FRT = Flippase recognition target.  
1057 **(B)** Visualization of PCR products from tail tip genotyping of wildtype (+/+), heterozygous (KI/+),  
1058 or homozygous (KI/KI) mice using primer pairs intended to amplify portions of wildtype or  
1059 hSTEAP1-KI alleles. NTC = null template control. **(C)** qPCR for human STEAP1 expression  
1060 normalized to 18S expression in a survey of tissues from hSTEAP1-KI/+ mice.  $n = 3$  for sex-  
1061 specific organs and  $n = 6$  for common organs. Bars represent SD. Photomicrographs of  
1062 STEAP1 IHC staining of **(D)** prostate tissues from (left) +/+ and (right) KI/+ mice and **(E)** an  
1063 adrenal gland from a KI/+ mouse. Scale bars = 50  $\mu\text{m}$ . **(F)** Schematic of the retroviral murinized  
1064 STEAP1 CAR construct. MuLV = murine leukemia virus; mCD19t = mouse truncated CD19. **(G)**  
1065 Quantification of the efficiency of retroviral transduction of activated mouse T cells from three  
1066 independent experiments based the frequency of mouse CD3<sup>+</sup>CD19t<sup>+</sup> cells by flow cytometry.  
1067 **(H)** Relative cell viability of RM9 or RM9-hSTEAP1 target cells over time measured by  
1068 fluorescence live cell imaging upon co-culture at a 1:1 ratio with mouse STEAP1-mBB $\zeta$  CAR T  
1069 cells or untransduced T cells.  $n = 4$  replicates per condition. Error bars represent SEM. For

1070 panel **G**, unpaired two-tailed Student's t test with Welch's correction was used. In panel **H**, two-  
1071 way ANOVA with Sidak's multiple comparison test was used.

1072

1073 **Figure 5. Determination of the efficacy and safety of mouse STEAP1-mBBζ CAR T cells in**

1074 **hSTEAP1-KI mice bearing syngeneic, disseminated prostate cancer. (A)** Schematic of the

1075 tumor challenge experiment for the RM9-hSTEAP1 disseminated model in hSTEAP1-KI/+ mice.

1076 Cy = cyclophosphamide (for preconditioning). **(B)** Serial live BLI of hSTEAP1-KI/+ mice

1077 engrafted with RM9-hSTEAP1-fLuc metastases and treated with a single intravenous injection

1078 of  $5 \times 10^6$  mouse untransduced T cells or STEAP1-mBBζ CAR T cells on day 0. Red X denotes

1079 deceased mice. Radiance scale is shown. **(C)** Plot showing the quantification of total flux over

1080 time from live BLI of each mouse in **B**. **(D)** Kaplan-Meier survival curves of mice in **B** with

1081 statistical significance determined by log-rank (Mantel-Cox) test. Plots of weights for each

1082 mouse (numbered in **B**) over time in the **(E)** mouse untransduced T cell treatment group and **(F)**

1083 STEAP1-mBBζ CAR T cell treatment group. **(G)** Photomicrographs at (left) low and (right) high

1084 magnification of STEAP1 IHC staining of RM9-hSTEAP1 lung tumors after treatment with

1085 mouse untransduced T cells showing regions of strong homogenous STEAP1 expression and

1086 heterogeneous STEAP1 expression. Scale bars = 50 μm, unless otherwise noted. **(H)**

1087 Photomicrographs at (left) low and (right) high magnification of STEAP1 IHC staining of RM9-

1088 hSTEAP1 tumors after treatment with STEAP1-mBBζ CAR T cells showing no STEAP1

1089 expression. Scale bars = 50 μm, unless otherwise noted.

1090



**Figure 1**

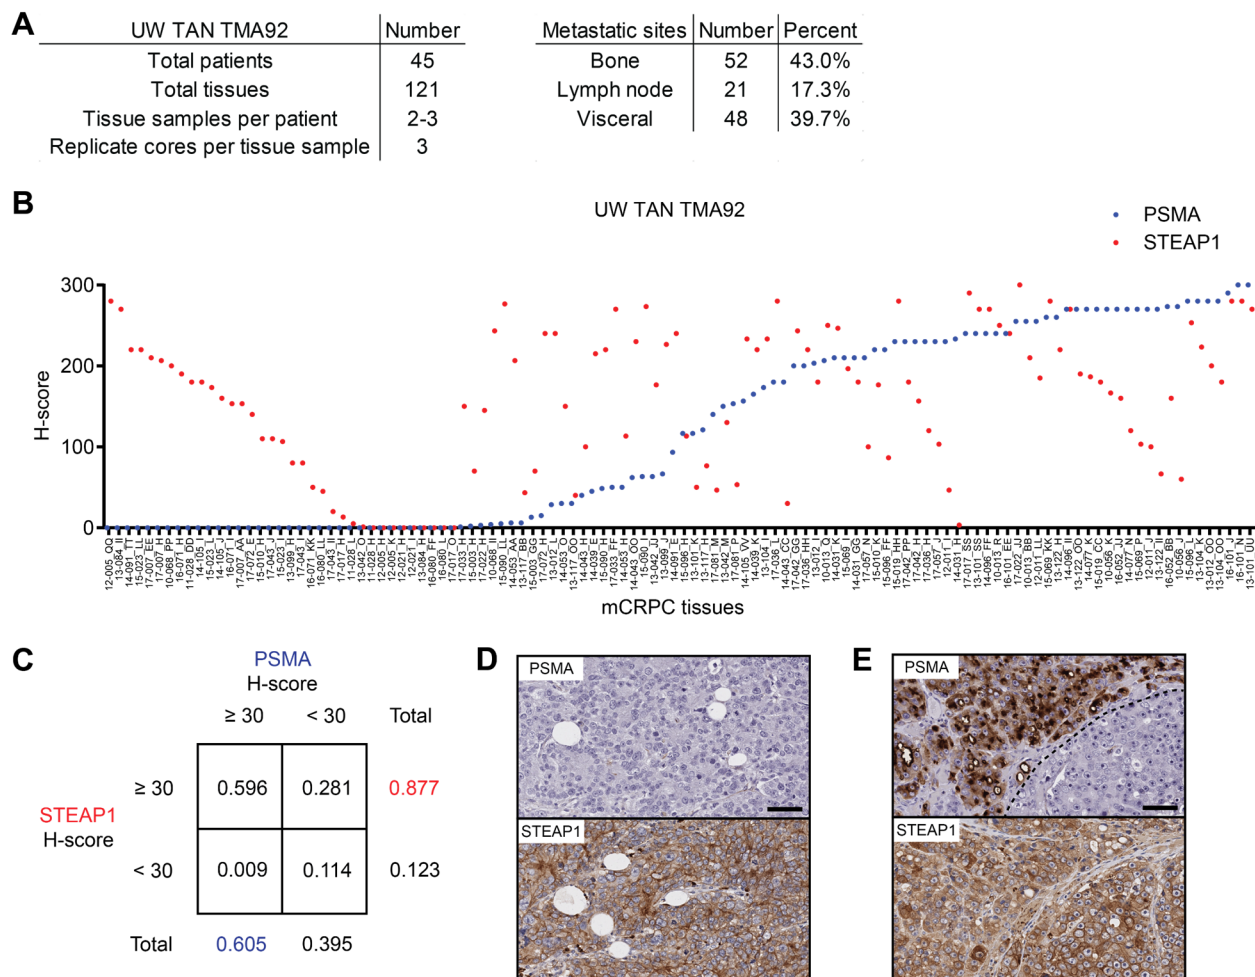

**Figure 2**

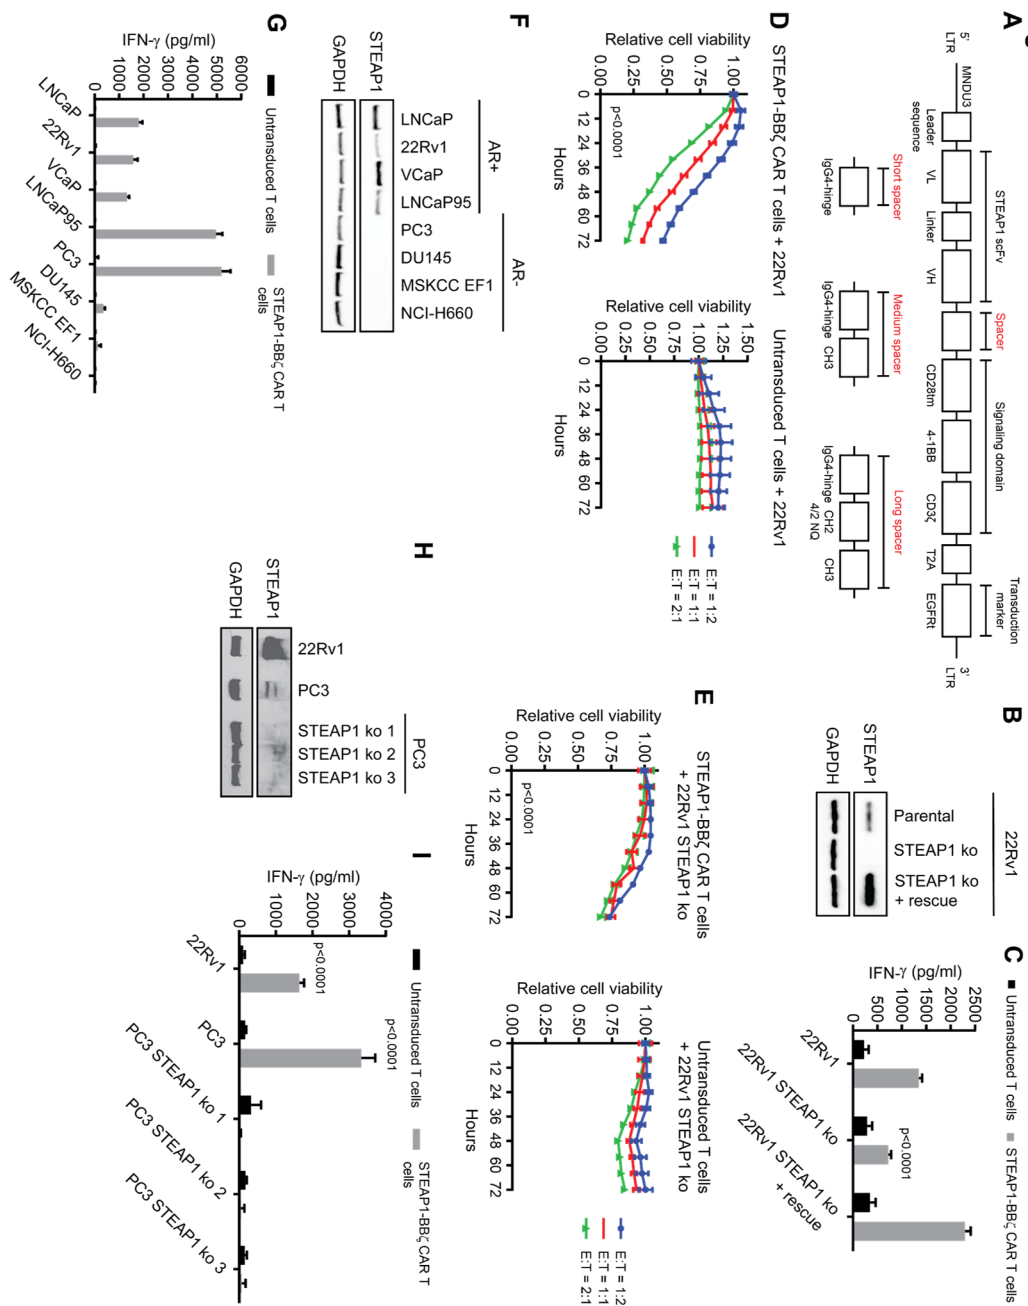



### Figure 3

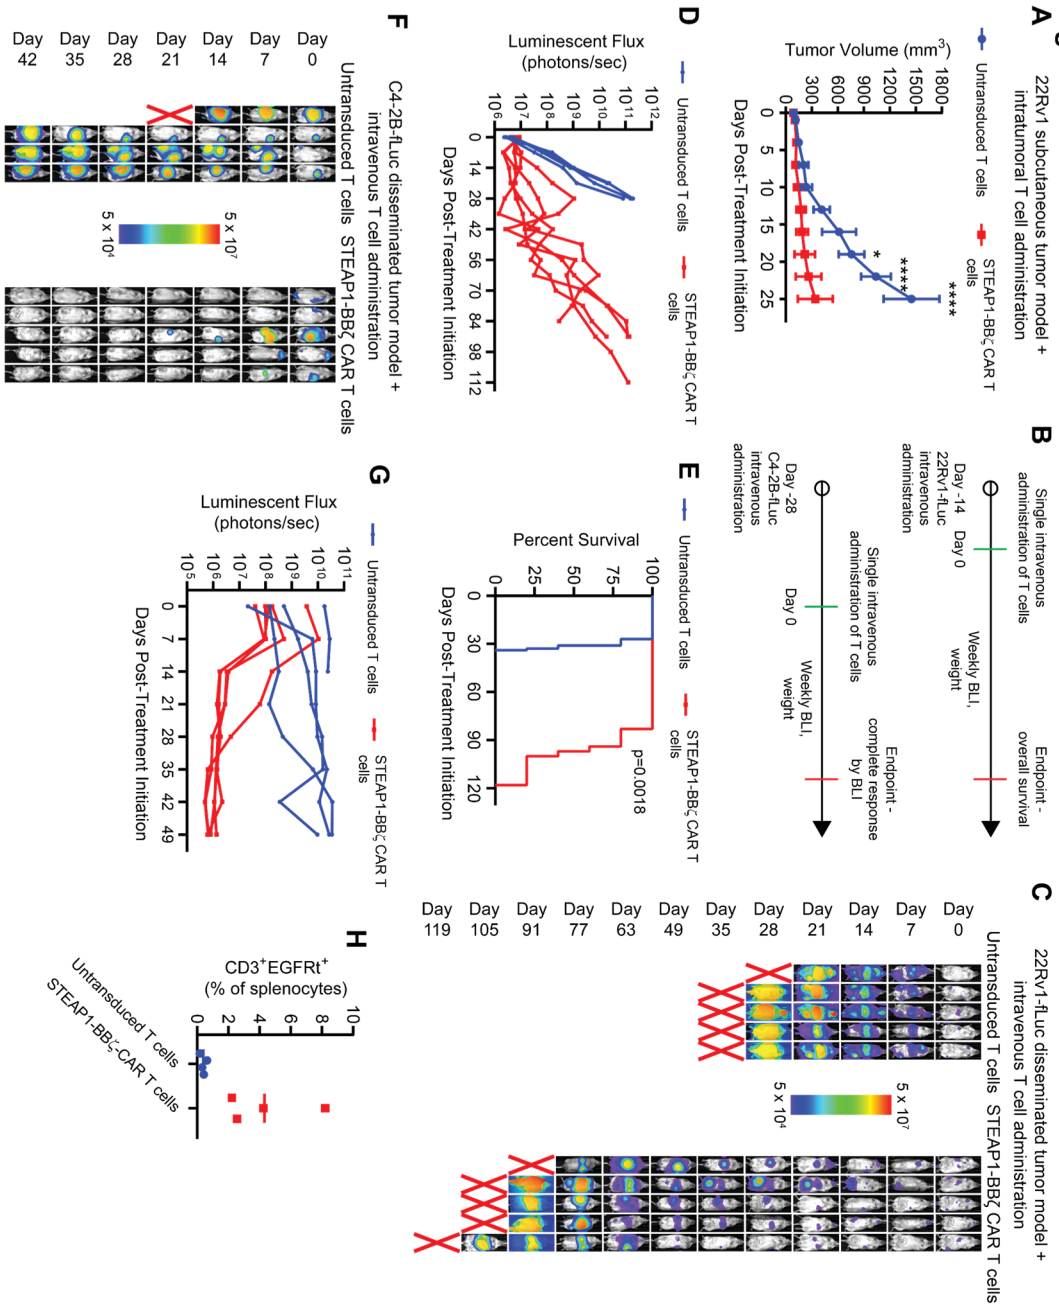

## Figure 4

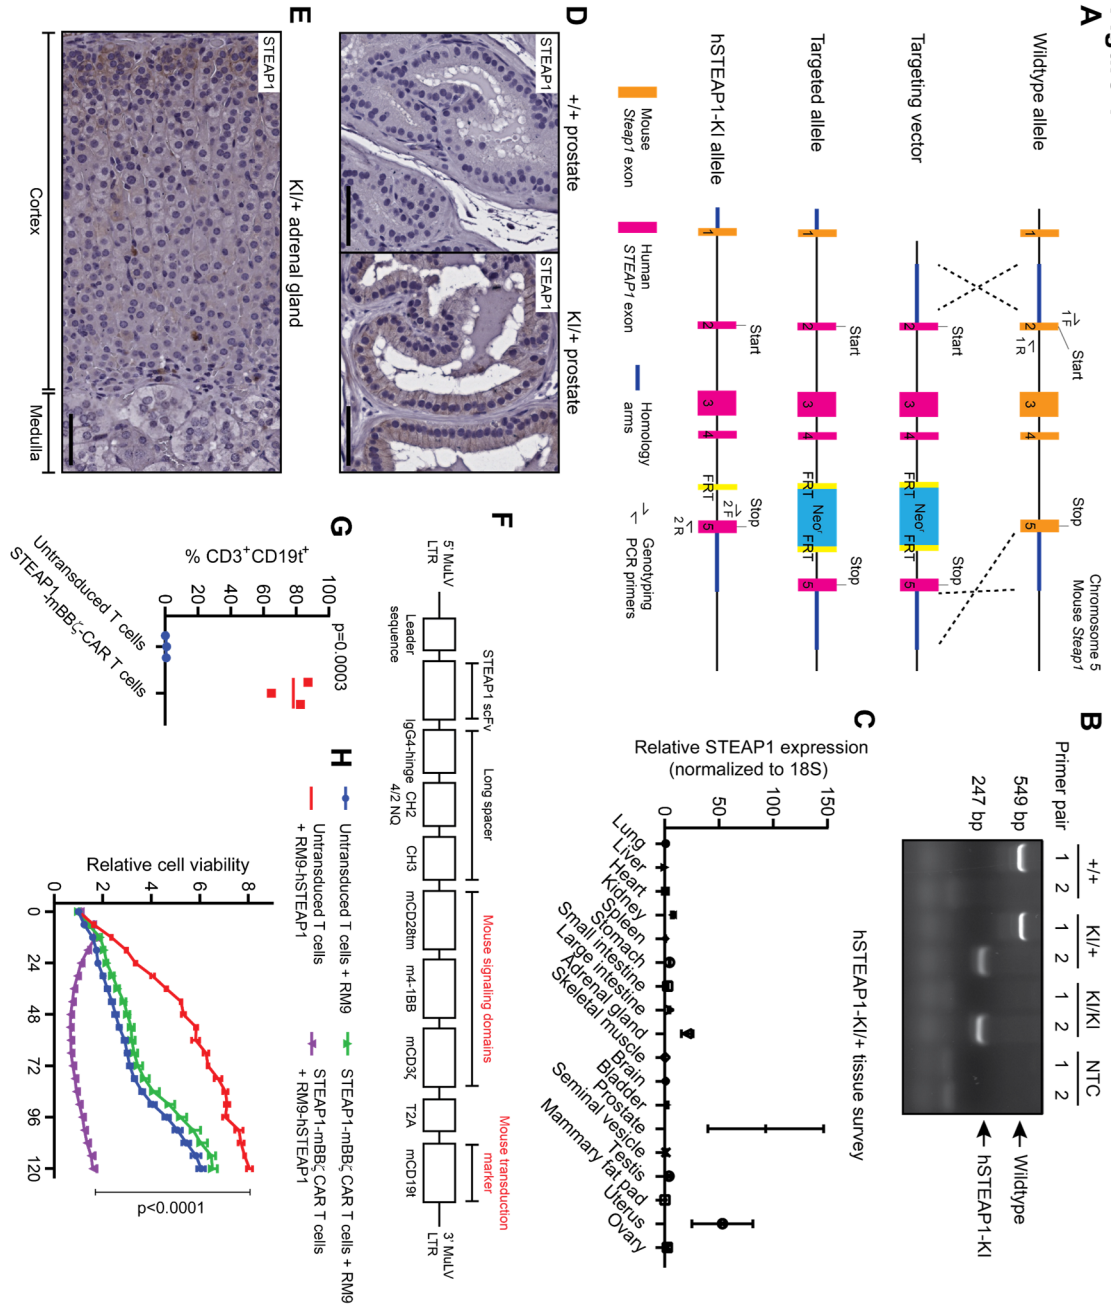

## Figure 5

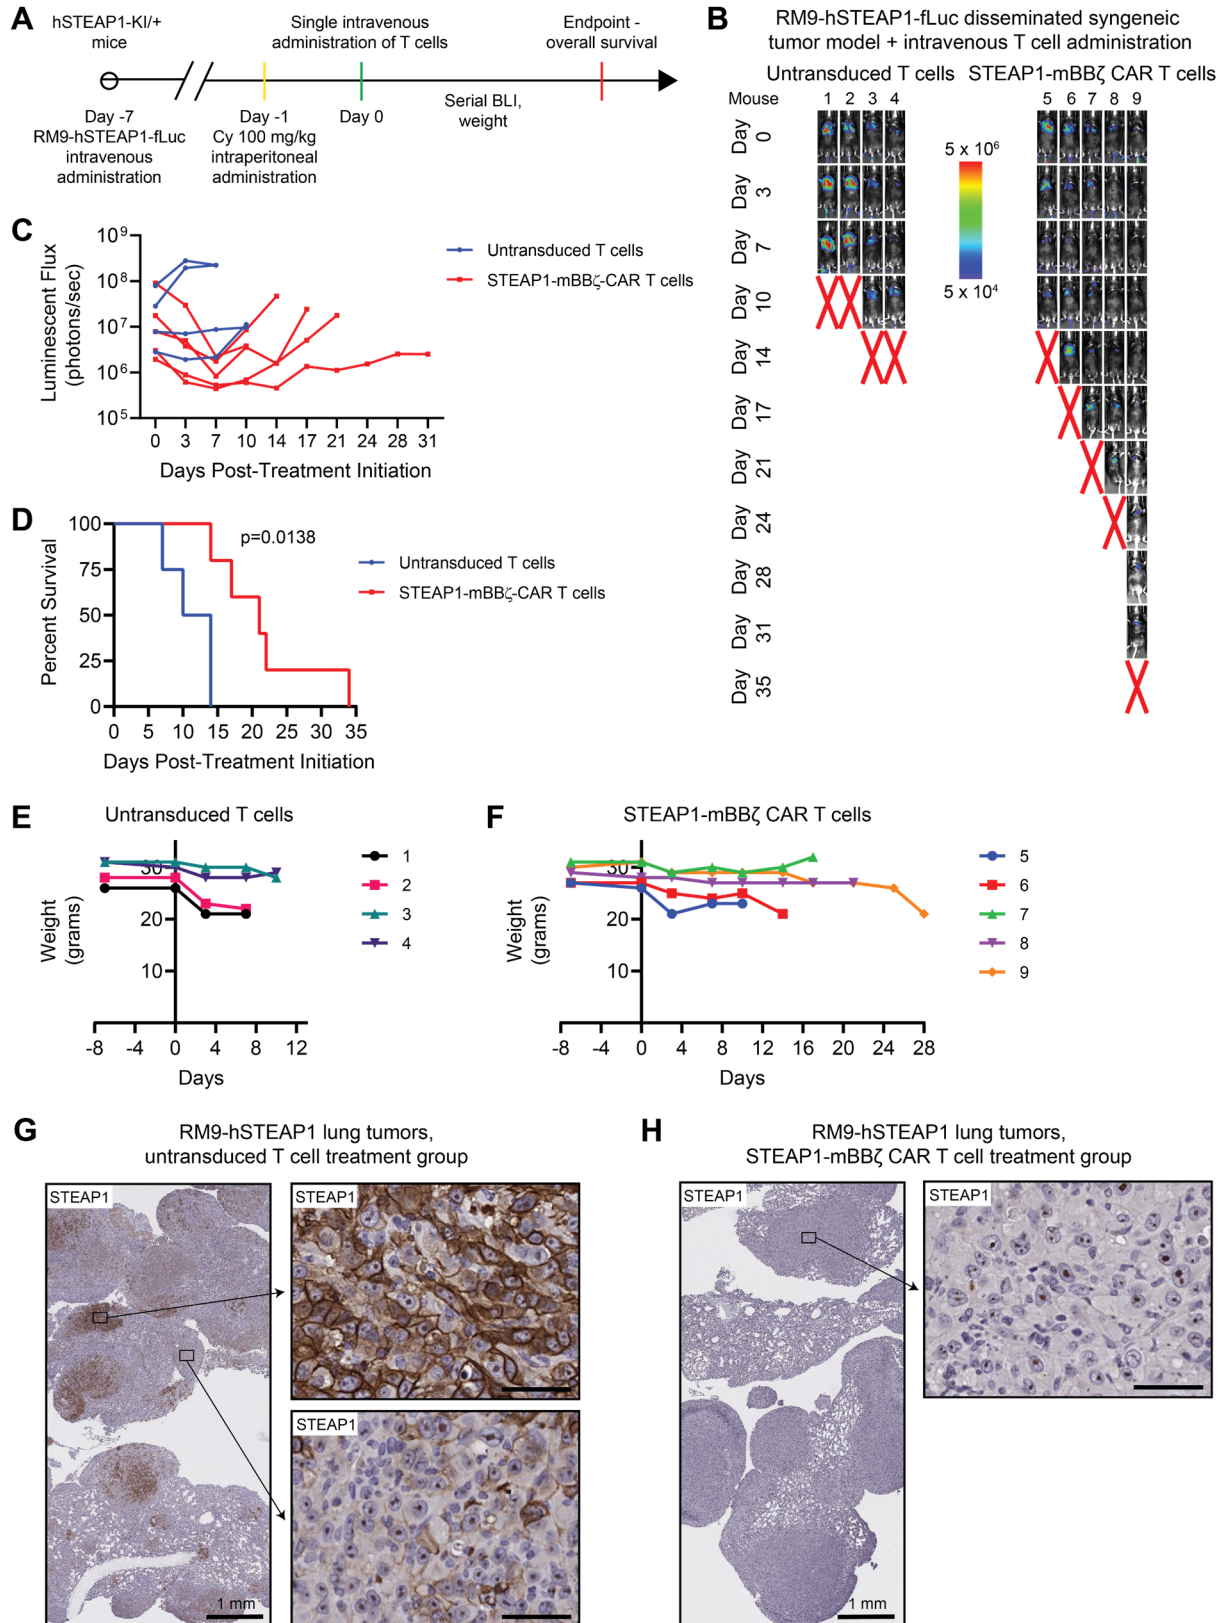

Source: https://www.biorxiv.org/content/10.1101/2022.05.16.492156v1.full.pdf
